# Supplementary material for: Identification, Molecular Cloning, and Analysis of Full-Length Hepatitis C Virus Transmitted/Founder Genotypes 1, 3, and 4
Source: PubMed Central journal article supplement — mBio. 2015 Feb 24;6(2):e02518-14. doi: 10.1128/mBio.02518-14 (PMC4358020; doi:10.1128/mbio.02518-14), 2015-02-24
Supplement: mbo001152189st1.pdf [file mbo001152189st1.pdf]

TABLE S1 Sample origin and characteristics of single-genome amplification fragments used for analyses.

| Infection status | Subject no.         | Genotype               | No. T/F genomes <sup>f</sup> | Region(s) covered                                    | Dates sampled                                                                                   | Viral loads (IU/mL)                                                                    | Max. amplicon length (nt)                 | No. of amplicons                 | Intralineage nucleotide diversity e |                |                | Interlineage nucleotide diversity e |                |                |    |
|------------------|---------------------|------------------------|------------------------------|------------------------------------------------------|-------------------------------------------------------------------------------------------------|----------------------------------------------------------------------------------------|-------------------------------------------|----------------------------------|-------------------------------------|----------------|----------------|-------------------------------------|----------------|----------------|----|
|                  |                     |                        |                              |                                                      |                                                                                                 |                                                                                        |                                           |                                  | Range (%)                           | Mean (%)       | Median (%)     | Range (%)                           | Mean (%)       | Median (%)     |    |
| Acute            | 10002 <sup>a</sup>  | 1a                     | 13                           | 5' half                                              | 12/9/98<br>12/22/98                                                                             | 1.57E6<br>4.30E6                                                                       | 4,905                                     | 31                               | 0.000 - 0.286                       | 0.104          | 0.061          | 0.225 - 3.20                        | 2.04           | 2.80           |    |
|                  | 10012 <sup>a</sup>  | 1a                     | 3                            | 5' half                                              | 3/18/02<br>3/25/02<br>4/6/02                                                                    | 7.95E6<br>10.3E6<br>3.81E6                                                             | 4,882                                     | 129                              | 0.000 - 0.144                       | 0.035          | 0.041          | 2.54 - 3.43                         | 3.02           | 3.03           |    |
|                  | 10017 <sup>a</sup>  | 1a                     | 4                            | 5' half                                              | 10/8/97<br>10/16/97<br>10/23/97<br>11/3/97                                                      | 1.49E6<br>5.46E5<br>1.39E6<br>3.77E5                                                   | 4,889                                     | 192                              | 0.000 - 0.185                       | 0.037          | 0.041          | 0.061 - 1.41                        | 1.14           | 1.26           |    |
|                  | 10020 <sup>a</sup>  | 1a                     | 10                           | 5' half                                              | 9/28/02<br>10/23/02                                                                             | 9.03E5<br>2.56E6                                                                       | 4,905                                     | 64                               | 0.000 - 0.143                       | 0.046          | 0.041          | 0.020 - 0.266                       | 0.123          | 0.122          |    |
|                  | 10021 <sup>a</sup>  | 1a                     | 1                            | 5' UTR<br>5' half<br>3' half<br>Poly(U/UC)           | 9/14/02<br>9/14/02<br>9/7/02<br>9/14/02<br>9/28/02<br>10/5/02                                   | 8.70E5<br>8.70E5<br>5.53E4<br>8.70E5<br>4.11E6<br>6.61E6                               | 773<br>4,878<br>4,188<br>483              | 6<br>96<br>27<br>46              | 0.000<br>0.000 - 0.082              | 0.000<br>0.027 | 0.000<br>0.024 | NA<br>NA                            | NA<br>NA       | NA<br>NA       |    |
|                  | 10024 <sup>a</sup>  | 1a                     | 6                            | X-tail<br>5' half                                    | 9/14/02<br>3/16/98<br>3/18/98                                                                   | 8.70E5<br>3.00E6<br>8.40E5                                                             | 93<br>4,882                               | 4<br>112                         | 0.000<br>0.000 - 0.123              | 0.000<br>0.025 | 0.000<br>0.000 | 0.479 - 1.41                        | 0.994          | 1.29           |    |
|                  | 10025 <sup>a</sup>  | 1a                     | 1                            | 5' UTR<br>5' half<br>3' half<br>Poly(U/UC)           | 3/31/98<br>3/31/98<br>3/31/98<br>3/19/98<br>3/31/98<br>4/13/98<br>4/16/98                       | 7.77E5<br>7.77E5<br>5.52E5<br>5.81E4<br>7.77E5<br>6.58E5<br>5.52E5                     | 437<br>4,882<br>4,183<br>491              | 5<br>92<br>16<br>22              | 0.000<br>0.000 - 0.144              | 0.000<br>0.044 | 0.000<br>0.048 | NA<br>NA                            | NA<br>NA       | NA<br>NA       |    |
|                  | 10029 <sup>a</sup>  | 1a                     | 9                            | X-tail<br>5' half                                    | 3/31/98<br>6/8/02<br>6/15/02<br>6/29/02                                                         | 7.77E5<br>1.06E6<br>3.09E6<br>9.19E5                                                   | 93<br>4,876                               | 5<br>201                         | 0.000 - 1.53<br>0.000 - 0.185       | 0.460<br>0.037 | 0.000<br>0.041 | 0.247 - 3.16                        | 2.27           | 2.92           |    |
|                  | 10062 <sup>a</sup>  | 1a                     | 3                            | 5' half                                              | 10/7/96<br>10/11/96<br>11/11/96                                                                 | 2.65E6<br>1.10E6<br>3.84E5                                                             | 4,858                                     | 140                              | 0.000 - 0.165                       | 0.025          | 0.021          | 0.393 - 0.809                       | 0.651          | 0.663          |    |
|                  | 105686 <sup>a</sup> | 1a                     | 2                            | 5' half                                              | 9/21/07                                                                                         | 8.53E5                                                                                 | 4,902                                     | 23                               | 0.000 - 0.163                       | 0.055          | 0.041          | 0.512 - 0.698                       | 0.584          | 0.574          |    |
|                  | 106889 <sup>a</sup> | 1a                     | >30                          | 5' half                                              | 7/8/08                                                                                          | 3.27E5                                                                                 | 4,902                                     | 87                               | 0.000 - 0.082                       | 0.024          | 0.020          | 0.041 - 1.03                        | 0.551          | 0.656          |    |
|                  | 110069 <sup>a</sup> | 1a                     | 4                            | 5' UTR<br>5' half<br>3' half<br>Poly(U/UC)           | 7/8/09<br>7/6/09<br>7/8/09<br>7/6/09<br>7/8/09<br>7/23/09<br>11/25/09                           | 3.37E6<br>4.13E5<br>3.37E6<br>4.13E5<br>3.37E6<br>5.62E5<br>2.00E4                     | 390<br>4,903<br>4,513<br>498              | 8<br>88<br>22<br>33              | 0.000<br>0.000 - 0.102              | 0.000<br>0.021 | 0.000<br>0.024 | 0.000<br>0.204 - 0.760              | 0.000<br>0.499 | 0.000<br>0.615 |    |
|                  | 6213 <sup>a</sup>   | 1a                     | 3                            | X-tail<br>5' half                                    | 7/6/09<br>2/22/96                                                                               | 4.13E5<br>1.82E5                                                                       | 93<br>4,905                               | 12<br>41                         | 0.000<br>0.000 - 0.001              | 0.000<br>0.000 | 0.000<br>0.000 | 0.000<br>3.10 - 6.68                | 0.000<br>6.19  | 0.000<br>6.51  |    |
|                  | 6222 <sup>a</sup>   | 1a                     | 4                            | 5' half                                              | 9/27/96                                                                                         | 4.02E5                                                                                 | 4,903                                     | 17                               | 0.020 - 0.204                       | 0.082          | 0.082          | 0.266 - 0.574                       | 0.406          | 0.389          |    |
|                  | 10051 <sup>a</sup>  | 1b                     | 1                            | 5' UTR<br>5' half<br>3' half<br>Poly(U/UC)           | 7/7/02<br>7/7/2002<br>7/19/02<br>7/7/02<br>6/30/02<br>7/15/02<br>7/19/02                        | 1.18E6<br>1.18E6<br>4.57E6<br>1.18E6<br>1.08E4<br>2.30E6<br>4.57E6                     | 536<br>4,865<br>4,423<br>478              | 10<br>124<br>28<br>38            | 0.000 - 0.564<br>0.000 - 0.103      | 0.250<br>0.020 | 0.187<br>0.021 | NA<br>NA                            | NA<br>NA       | NA<br>NA       |    |
|                  | 9055 <sup>a</sup>   | 3a                     | 1                            | X-tail<br>5' UTR<br>5' half<br>3' half<br>Poly(U/UC) | 7/15/02<br>3/19/02<br>3/10/02<br>3/19/02<br>4/10/02<br>3/19/02<br>3/10/02<br>3/19/02<br>4/10/02 | 2.30E6<br>1.62E6<br>1.31E6<br>1.62E6<br>5.79E5<br>1.62E6<br>1.31E6<br>1.62E6<br>5.79E5 | 93<br>802<br>4,912<br>4,393<br>732        | 11<br>8<br>157<br>9<br>45        | 0.000 - 1.29<br>0.000 - 0.125       | 0.235<br>0.031 | 0.000<br>0.000 | NA<br>NA                            | NA<br>NA       | NA<br>NA       |    |
|                  | 10003 <sup>a</sup>  | 3a                     | >30                          | X-tail<br>5' half                                    | 3/19/02<br>10/29/02<br>11/5/02<br>11/17/02                                                      | 1.62E6<br>1.25E6<br>3.55E5<br>3.26E5                                                   | 92<br>4,917                               | 4<br>133                         | 0.000<br>0.000 - 0.102              | 0.000<br>0.031 | 0.000<br>0.020 | 0.041 - 0.429                       | 0.160          | 0.163          |    |
|                  | 105431 <sup>b</sup> | 4a                     | 2                            | 5' UTR<br>5' half<br>3' half<br>Poly(U/UC)<br>X-tail | 9/12/07<br>9/12/07<br>9/12/07<br>9/7/07<br>9/12/07<br>9/24/07<br>9/12/07                        | 4.12E6<br>4.12E6<br>4.12E6<br>2.33E3<br>4.12E6<br>5.18E5<br>4.12E6                     | 668<br>4,906<br>4,597<br>398<br>482<br>92 | 40<br>59<br>43<br>69<br>13<br>15 | 0.000 - 0.300<br>0.000 - 0.082      | 0.026<br>0.017 | 0.000<br>0.022 | 0.300 - 0.451<br>0.348 - 0.430      | 0.314<br>0.374 | 0.300<br>0.368 |    |
|                  | Chronic             | ARJA6267 <sup>a</sup>  | 1a                           | NA                                                   | 5' half<br>Poly(U/UC)                                                                           | 3/19/09<br>3/19/09                                                                     | 4.00E6<br>4.00E6                          | 4,877<br>370                     | 43<br>8                             | 0.062 - 2.52   | 1.25           | 0.640                               | NA             | NA             | NA |
|                  |                     | BLMI6862 <sup>a</sup>  | 1a                           | NA                                                   | 5' half<br>Poly(U/UC)                                                                           | 10/3/08<br>10/3/08                                                                     | 1.83E6<br>1.83E6                          | 4,881<br>460                     | 22<br>14                            | 0.145 - 2.20   | 1.01           | 0.498                               | NA             | NA             | NA |
|                  |                     | JOTO6422 <sup>a</sup>  | 1a                           | NA                                                   | 5' half<br>Poly(U/UC)                                                                           | 7/31/07<br>7/31/07                                                                     | 2.85E6<br>2.85E6                          | 4,888<br>403                     | 21<br>9                             | 0.246 - 2.43   | 1.56           | 1.49                                | NA             | NA             | NA |
|                  |                     | KNPH3730 <sup>a</sup>  | 1a                           | NA                                                   | 5' half<br>Poly(U/UC)                                                                           | 4/22/09<br>4/22/09                                                                     | 1.30E6<br>1.30E6                          | 4,887<br>383                     | 13<br>23                            | 0.123 - 2.04   | 0.929          | 0.825                               | NA             | NA             | NA |
|                  |                     | LAST90001 <sup>a</sup> | 1a                           | NA                                                   | 5' half                                                                                         | 1/25/11                                                                                | 2.40E6                                    | 4,839                            | 19                                  | 0.083 - 1.51   | 0.730          | 0.228                               | NA             | NA             | NA |
|                  |                     | ROMI6847 <sup>a</sup>  | 1a                           | NA                                                   | 5' half<br>Poly(U/UC)                                                                           | 9/2/08<br>9/2/08                                                                       | 1.44E6<br>1.44E6                          | 4,902<br>404                     | 18<br>9                             | 0.082 - 1.32   | 0.879          | 0.946                               | NA             | NA             | NA |
|                  |                     | SLRO5563 <sup>a</sup>  | 1a                           | NA                                                   | 5' half<br>Poly(U/UC)                                                                           | 9/16/09<br>9/16/09                                                                     | 1.00E6<br>1.00E6                          | 4,904<br>482                     | 29<br>13                            | 0.245 - 3.31   | 1.09           | 0.636                               | NA             | NA             | NA |
|                  |                     | WEPAS774 <sup>a</sup>  | 1a                           | NA                                                   | 5' half<br>Poly(U/UC)                                                                           | 5/11/09<br>5/11/09                                                                     | 6.40E6<br>6.40E6                          | 4,903<br>467                     | 44<br>10                            | 0.102 - 3.08   | 1.71           | 2.46                                | NA             | NA             | NA |
|                  |                     | WHRO3882 <sup>a</sup>  | 1a                           | NA                                                   | 5' half                                                                                         | 11/2/05                                                                                | 1.46E5                                    | 4,899                            | 22                                  | 0.123 - 1.01   | 0.504          | 0.328                               | NA             | NA             | NA |
|                  |                     | WIMI4025 <sup>a</sup>  | 1a                           | NA                                                   | 5' half<br>Poly(U/UC)                                                                           | 10/3/08<br>10/3/08                                                                     | 7.69E6<br>7.69E6                          | 4,887<br>502                     | 36<br>16                            | 0.122 - 3.93   | 1.32           | 1.24                                | NA             | NA             | NA |
|                  |                     | WIMI90003 <sup>a</sup> | 1a                           | NA                                                   | 5' half                                                                                         | 1/25/11                                                                                | 2.08E+06                                  | 4,839                            | 28                                  | 0.145 - 2.20   | 1.01           | 0.498                               | NA             | NA             | NA |
