# Supplementary material for: Identification, Molecular Cloning, and Analysis of Full-Length Hepatitis C Virus Transmitted/Founder Genotypes 1, 3, and 4
Source: PubMed Central journal article supplement — mBio. 2015 Feb 24;6(2):e02518-14. doi: 10.1128/mBio.02518-14 (PMC4358020; doi:10.1128/mbio.02518-14), 2015-02-24
Supplement: mbo001152189st2.pdf [file mbo001152189st2.pdf]

TABLE S2: Poly-UC tract hypervariation as revealed by Needleman-Wunsch pairwise analysis.

|           | CD81 Binding domain I |          |            | Hypervariable Region I |          |            | Poly UC (short) <sup>a</sup> |          |            | Poly UC (long) <sup>b</sup> |                 |                 |
|-----------|-----------------------|----------|------------|------------------------|----------|------------|------------------------------|----------|------------|-----------------------------|-----------------|-----------------|
|           | Range (%)             | Mean (%) | Median (%) | Range (%)              | Mean (%) | Median (%) | Range (%)                    | Mean (%) | Median (%) | Range (%)                   | Mean (%)        | Median (%)      |
| 9055TF    | 95.5 - 100            | 99.9     | 100        | 100                    | 100      | 100        | 96.0 - 100                   | 99.6     | 100        | 100                         | 100             | 100             |
| 10021TF   | 100                   | 100      | 100        | 100                    | 100      | 100        | 85.3 - 100                   | 97.6     | 100        | 89 - 100                    | 98.2            | 100             |
| 10025TF   | 100                   | 100      | 100        | 95.5 - 100             | 99.8     | 100        | 92.0 - 100                   | 97.0     | 100        | 91.0 - 100                  | 96.9            | 97.0            |
| 10051TF   | 100                   | 100      | 100        | 100                    | 100      | 100        | 96.0 - 100                   | 99.3     | 100        | 94.0 - 100                  | 99.0            | 100             |
| 105431TF1 | 100                   | 100      | 100        | 100                    | 100      | 100        | 96.0 - 100                   | 99.4     | 100        | NA <sup>c</sup>             | NA <sup>c</sup> | NA <sup>c</sup> |
| 105431TF2 | 100                   | 100      | 100        | 100                    | 100      | 100        | 88.0 - 100                   | 93.9     | 92.0       | NA <sup>c</sup>             | NA <sup>c</sup> | NA <sup>c</sup> |
| 110069TF1 | 100                   | 100      | 100        | 95.5 - 100             | 99.7     | 100        | 100                          | 100      | 100        | 100                         | 100             | 100             |
| ARJA6267  | 82.0 - 100            | 95.5     | 95.5       | 68.5 - 100             | 87.9     | 91.0       | 84.0 - 96.0                  | 90.7     | 92.0       | NA <sup>c</sup>             | NA <sup>c</sup> | NA <sup>c</sup> |
| BLMI6862  | 91.0 - 100            | 98.5     | 100        | 86.5 - 100             | 94.4     | 95.5       | 59.8 - 92.0                  | 74.1     | 74.9       | 68.8 - 86.0                 | 76.2            | 75.7            |
| JOTO6422  | 91.0 - 100            | 100      | 100        | 64.0 - 100             | 87.1     | 95.5       | 52.4 - 84.0                  | 70.0     | 73.3       | 68.0 - 80.0                 | 73.1            | 72.4            |
| KNPH3730  | 100                   | 100      | 100        | 77.5 - 100             | 93.8     | 95.5       | 59.8 - 96.0                  | 76.6     | 76.4       | 72.2 - 95.0                 | 82.2            | 82.3            |
| ROMI6847  | 100                   | 100      | 100        | 59.8 - 100             | 77.2     | 74.5       | 61.8 - 92.0                  | 73.7     | 73.3       | 68.3 - 81.2                 | 75.3            | 76.3            |
| SLRO5563  | 91.0 - 100            | 98.6     | 100        | 59.5 - 100             | 93.2     | 100        | 61.6 - 85.3                  | 73.4     | 73.3       | 66.8 - 83.7                 | 75.1            | 75.8            |
| WEPA5774  | 95.5 - 100            | 97.6     | 95.5       | 64.0 - 95.5            | 82.8     | 86.5       | 48.0 - 85.3                  | 66.6     | 66.2       | 67.8 - 85.0                 | 72.7            | 70.9            |
| WIMI4025  | 91.0 - 100            | 96.6     | 95.5       | 52.0 - 100             | 95.1     | 100        | 56.9 - 100                   | 78.0     | 76.4       | 67.7 - 97.0                 | 80.5            | 80.1            |
