# Supplementary material for: Identification, Molecular Cloning, and Analysis of Full-Length Hepatitis C Virus Transmitted/Founder Genotypes 1, 3, and 4
Source: PubMed Central journal article supplement — mBio. 2015 Feb 24;6(2):e02518-14. doi: 10.1128/mBio.02518-14 (PMC4358020; doi:10.1128/mbio.02518-14), 2015-02-24
Supplement: mbo001152189st3.pdf [file mbo001152189st3.pdf]

TABLE S3: Oligonucleotide primers used to amplify and sequence viral genome fragments.

1a Reverse Transcription primers

| Oligonucleotide | Sequence                   | AF009606 position |
|-----------------|----------------------------|-------------------|
| 5' UTR          | Random Decamers            | NA                |
| 5' half genome  |                            |                   |
| 1aNS3-R2v2      | GGTGCTCGTGACGACCTCGAGGTC   | R: 5295←5318      |
| 3' half genome  |                            |                   |
| 1aNS5B.R2       | TCGGTTGGGGAGGAGGTAGATGCCTA | R: 9349←9374      |
| Poly-U/UC Tract |                            |                   |
| U3tailR3        | CATGCGGCTCACGGACCTT        | R: 9587←9605      |
| 3' UTR          |                            |                   |
| 3termi-R2       | AGCGAGCACAGATGGACTACAGACG  | NA                |

1a Amplification Primers

| Oligonucleotide    | Sequence                                                         | AF009606 position |
|--------------------|------------------------------------------------------------------|-------------------|
| 5' UTR             |                                                                  |                   |
| Ambion FirstChoice |                                                                  |                   |
| 5' adaptor         | GGCGATGAATGAACACTGCGTTTGCTGGCTTTGATGAAA                          | NA                |
| 5UTR-F1            | GCTGATGGCGATGAAT                                                 | NA                |
| 5UTR-F2            | GCTGGCTTTGATGAA                                                  | NA                |
| 1aU5UTR_R2         | AAGATCCCTGTTGCATAGTTCA                                           | R: 826←848        |
| 1aU5UTR_R1         | TACTCGAGTTAGGGCAATCATT                                           | R: 954←975        |
| 5' half genome     |                                                                  |                   |
| 1aCORE-F1-342      | ATGAGCACGAATCCTAAACCTCAAAGA                                      | F: 342→368        |
| 1aCORE-F2-362      | TCAAAGAAAAACCAAACGTAACACCAACCG                                   | F: 362→391        |
| 1aNS4A-R1          | GCACTCTCCATCTCATCGAACTC                                          | R: 5451←5474      |
| 1aNS3-R2v2         | GGTGCTCGTGACGACCTCGAGGTC                                         | R: 5295←5318      |
| 3' half genome     |                                                                  |                   |
| 1aNS3.F1           | ACTCATATAGACGCCACTTTCTATCCCA                                     | F: 5037→5065      |
| 1aNS3.F2           | CATCGTGGGACCAGATGTGGAAG                                          | F: 5146→5168      |
| 1aNS5B.R1          | TCATCGGTTGGGGAGGAGGTAGAT                                         | R: 9354←9377      |
| 1aNS5B.R2          | TCGGTTGGGGAGGAGGTAGATGCCTA                                       | R: 9349←9374      |
| Poly-U/UC Tract    |                                                                  |                   |
| 1aNTRF1            | ATCTACGGAGCCTGCTACTCCATAG                                        | F: 8940→8964      |
| 1aNTRF2            | AATAGGGTGGCCGCATGCCTCAGAAAACTTG                                  | F: 9048→9078      |
| U3tailR3           | CATGCGGCTCACGGACCTT                                              | R: 9587←9605      |
| U3tailR4           | CGGCTCACGGACCTTTCACA                                             | R: 9582←9601      |
| 3' UTR             |                                                                  |                   |
| 3'RACE Adaptor     | /5Phos/ rCrGrUrCrUrGrUrArGrUrCrCrArUrCrUrGrUrGrCrUrCrGrCrU/3ddC/ | NA                |
| 1a3'raceF1         | TTCTTCTTAATGGTGGCTCCAT                                           | F: 9537→9559      |
| 1a3'raceF2         | TTAATGGTGGCTCCATCTTA                                             | F: 9544→9563      |
| 3termi-R1          | AGAGTCATGCTACTAGCGAGCACAGATGG                                    | NA                |
| 3termi-R2          | AGCGAGCACAGATGGACTACAGACG                                        | NA                |

1a Sequencing Primers

| Oligonucleotide    | Sequence                                |
|--------------------|-----------------------------------------|
| Ambion FirstChoice | GGCGATGAATGAACACTGCGTTTGCTGGCTTTGATGAAA |
| 5' adaptor         |                                         |
| 5UTR-F1            | GCTGATGGCGATGAAT                        |
| 5UTR-F2            | GCTGGCTTTGATGAA                         |
| 1aCore-R2-2v2      | GATGACCTTACCCAAATTGCG                   |
| 1aCore-R2-3        | CCTTACCCAAATTGCGCGACCTAC                |
| 1aCORE-F1-342      | ATGAGCACGAATCCTAAACCTCAAAGA             |
| 1aCORE-F2-362      | TCAAAGAAAAACCAAACGTAACACCAACCG          |
| 1aNS4A-R1          | GCACTCTCCATCTCATCGAACTC                 |
| 1aNS3-R2v2         | GGTGCTCGTGACGACCTCGAGGTC                |
| 1.F1               | GTAATGCTGATAGGGTGGCTTGCGA               |
| R2                 | TTGGTTTTCTTTGAGGTTTAGGA                 |
| R4                 | CGACCTACGCCGGGGGTC                      |
| F2.2               | GGGTAAGGTATCGATACCCT                    |
| F4                 | TCCATGGTGGGAACTGGG                      |
| F6.1a              | GTGGTGGTGGGAACGACCGA                    |
| R6                 | CGAGAGTATGTGGCTTCCGGATG                 |
| F8                 | CTCCTGCTTGTGGATGATG                     |
| F9                 | CTGTGGGTCCCCCCTCA                       |
| 1.F10              | CGTCTTCTCCCGAATGGAGAC                   |
| 10025.F9           | GTATGGGTCCCCCCTCA                       |
| 10025.F10          | CGTCTTTTCCAGATGGAGAC                    |
| 10025.F12          | GTCATTCCCGTACGCCG                       |
| 110069.F10         | CGTCTTCTCCAGATGGAGAC                    |
| 1.F12              | GTCATTCCCGTACGCCG                       |
| 1.F14              | CGTACTCCACCTACGGCAAGTTC                 |
| 1.F16              | CACGTGTGCACCCAGACAG                     |
| 1aF17              | CTCTACCRGGAGTTTCGATGAGATGGA             |
| 10025.F17          | CTCTACCRGGAGTTTCGATGAAATGGA             |
| 110069.F17         | CTCTACAAAGAATTCGATGAGATGGA              |
| 110069.F19         | CGTGGCATTTAAGATCATGAGCGG                |
| 10021.F19          | TTGTAGCATTCAAGATCATGGGCGG               |
| 10025.F19          | TCGTGGCATTCAAGATCATGAGCGG               |
| 10025.F22          | AACGGGACGATGAGGCT                       |
| 1aF21              | GACATCTGGGACTGGATATGCCA                 |
| 1aF22              | AACGGGACGATGAGGAT                       |
| 1aF24              | GAGTCAGAGAACAAAGTGGT                    |
| 1aF25              | TTTGGCAGCTCCTCAACTTC                    |
| 10025.F25          | TTTGGCAGCTCCTCAACTTC                    |
| 1aF26              | AGAAGAAAGTCACATTTGACAGACTGC             |
| 110069.F26         | AGAAGAAAGTCACATTTGACAGACTAC             |
| 1aF28              | GAYATCCGTACGGAGGAGGCAA                  |
| 1aF30              | GCCTGCTACTCCATAGAACC                    |
| pBR322.F           | CCTGACGTCTAAGAAACCATTATTATCATGACATT     |
| pBR322.R           | GGTGCCTGACTGCGTTAGCAA                   |

## 1b Reverse Transcription Primers

| Oligonucleotide | Sequence                  | AF009606 position |
|-----------------|---------------------------|-------------------|
| 5' UTR          | Random Decamers           | NA                |
| 5' half genome  |                           |                   |
| 1bNS3-R2        | GGTGCTCGTGACGACCTCCAGGTC  | R: 5295←5318      |
| 3' half genome  |                           |                   |
| 1bNS5B.R1       | TCATCGATTGGGGAGCAGGTAGAT  | R: 9354←9377      |
| Poly-U/UC Tract |                           |                   |
| U3tailR3        | CATGCGGCTCACGGACCTT       | R: 9587←9605      |
| 3' UTR          |                           |                   |
| 3termi-R2       | AGCGAGCACAGATGGACTACAGACG | NA                |

## 1b Amplification Primers

| Oligonucleotide    | Sequence                                                         | AF009606 position |
|--------------------|------------------------------------------------------------------|-------------------|
| 5' UTR             |                                                                  |                   |
| Ambion FirstChoice |                                                                  |                   |
| 5' adaptor         | GGCGATGAATGAACACTGCGTTTGCTGGCTTTGATGAAA                          | NA                |
| 5UTR-F1            | GCTGATGGCGATGAAT                                                 | NA                |
| 5UTR-F2            | GCTGGCTTTGATGAA                                                  | NA                |
| 1bU5UTR_R2         | AGCGGAAACTGGGATGGTCAAACA                                         | R: 891←914        |
| 1bU5UTR_R3         | CAAACAGGACAGCAAAGCCAAAAG                                         | R: 873←896        |
| 5' half genome     |                                                                  |                   |
| 1bCORE-F1-342      | ATGAGCACGAATCCTAAACCTCAAAGA                                      | F: 342→368        |
| 1bCORE-F2-362      | TCAAAGAAAAACCAAACGTAACACCAACCG                                   | F: 362→391        |
| 1bNS4A-R1          | GCACTCTCCATCTCATCGAACTC                                          | R: 5451←5474      |
| 1bNS3-R2           | GGTGCTCGTGACGACCTCCAGGTC                                         | R: 5295←5318      |
| 3' half genome     |                                                                  |                   |
| 1bNS3.F1           | CCTTCGGGCATGTTTCGATTCCCTC                                        | F: 4841→4861      |
| 1bNS3.F2           | TCCTCGGTCCTGTGTGAGTGCTATGA                                       | F: 4878→4899      |
| 1bNS5B.R1          | TCATCGATTGGGGAGCAGGTAGAT                                         | R: 9354←9377      |
| 1bNS5B.R2          | TACAGAAAGTAGGAGTAGGC                                             | R: 9325←9344      |
| Poly-U/UC Tract    |                                                                  |                   |
| 1bNTRF1            | ATCTACGGGGCTACCTACTCCATTG                                        | F: 8940→8964      |
| 1bNTRF2            | AATAGGGTGGCTTCATGCCTCAGAAAACTTG                                  | F: 9048→9078      |
| U3tailR3           | CATGCGGCTCACGGACCTT                                              | R: 9587←9605      |
| U3tailR4           | CGGCTCACGGACCTTTCACA                                             | R: 9582←9601      |
| 3' UTR             |                                                                  |                   |
| 3'RACE Adaptor     | /5Phos/ rCrGrUrCrUrGrUrArGrUrCrCrArUrCrUrGrUrGrCrUrCrGrCrU/3ddC/ | NA                |
| 1b3'raceF1         | TTCTTCTTTGGTGGCTCCAT                                             | F: 9540→9559      |
| 1b3'raceF2         | TCTTTGGTGGCTCCATCTTA                                             | F: 9541→9563      |
| 3termi-R1          | AGAGTCATGTCCTAGCGAGCACAGATGG                                     | NA                |
| 3termi-R2          | AGCGAGCACAGATGGACTACAGACG                                        | NA                |

## 1b Sequencing Primers

| Oligonucleotide | Sequence                            |
|-----------------|-------------------------------------|
| 1.F1            | GTA CTGCCTGATAGGGTGCTTGCGA          |
| R2              | TTGGTTTTCTTTGAGGTTTAGGA             |
| F2.2            | GGGTAAGGTCATCGATAACCTT              |
| F3.1b           | GTCGATTTGCTCGTTGGGG                 |
| F4              | TCCATGGTGGGGAAGTGGG                 |
| 10051.F16b      | GTTGTGGTGGGACGACCGA                 |
| F8              | CTCCTGCTGTGGATGATG                  |
| 1bR2            | CACRTGAGGAGGATGATGGC                |
| 1bF10           | GGTCATTATGTCCAAATGG                 |
| 10051.F13       | ATCAACGGCGTGTGTTGGACT               |
| 10051.F14       | TATGGAAACTACCATGCGGT                |
| 1.F14           | CGTACTCCACCTACGGCAAGTTC             |
| 10051.F15       | AACATTGGAGAGATCCCCTTCTA             |
| 1.F16           | CACGTGTGCACCCAGACAG                 |
| 1bF17           | CCATCGTGGGATCAAATGTGGAA             |
| 1b.F19          | TTCTGGGCGAAGCATATGTGGAA             |
| 10051.F21       | GGGCCGTCCAGTGGATGAA                 |
| 1b.F23          | GACATGTCAAAAACGGTTCCATGA            |
| 1b.F25          | GTGCTCACTTCCATGCT                   |
| 1b.F26          | TTGAGTCGTA CTCTCCATG                |
| 1b.F27          | AACATGGTCTATGCCACAAC                |
| 1b.F28          | CACTCGGCCAAATCCAAATTTGGCTA          |
| 1b.F29          | TGGGGGTTCTGTGTGCGAGAA               |
| 10051.F30       | AAGGCCGCTGCGCCTGTGCGAGC             |
| 1b.F31          | TCCAATGTGTGGTTCGCGCACGA             |
| 1b.F32          | CCACTTGACCTACCTCAGATCAT             |
| pBR322.R        | GGTGCCTGACTGCGTTAGCAA               |
| pBR322.F        | CCTGACGTCTAAGAAACCATTATTATCATGACATT |

### 3a Reverse Transcription Primers

| Oligonucleotide | Sequence                       | AF009606 position |
|-----------------|--------------------------------|-------------------|
| 5' UTR          | Random Decamers                | NA                |
| 5' half genome  |                                |                   |
| 3aNS3-R2v2-5287 | TTACTTCCAGATCAGCTGACA          | R: 5287←5307      |
| 3' half genome  |                                |                   |
| 3aNS5B-R-9055   | GTACCCCAAGTTTCCTGAGG           | R: 9055←9074      |
| Poly-U/UC Tract |                                |                   |
| XR9582          | ATGCGGCTCACGGACCTTTCACA        | R: 9582←9604      |
| 3' UTR          |                                |                   |
| 3'RACE-R2       | GTAGTTTCGGTCGTTTGCCTCACAAGTAAG | NA                |

### 3a Amplification Primers

| Oligonucleotide    | Sequence                                                                        | AF009606 position |
|--------------------|---------------------------------------------------------------------------------|-------------------|
| 5' UTR             |                                                                                 |                   |
| Ambion FirstChoice |                                                                                 |                   |
| 5' adaptor         | GGCGATGAATGAACACTGCGTTTGGCTTTGATGAAA                                            | NA                |
| 5'RACE-F1          | GCTGATGGCGATGAATGAACACTG                                                        | NA                |
| 5'RACE-F2          | CGCGGATCCGAACACTGCGTTTGGCTTTGATG                                                | NA                |
| 3a5'-R1-841        | GAGCAACCGGGCAAGTTC                                                              | R: 842←859        |
| 3a5'-R2-803        | CCCGTCTCAAGGGCCCTCAC                                                            | R: 802←824        |
| 5' half genome     |                                                                                 |                   |
| 3aCOR-F1-342       | ATGAGCACACTTCCTAAACCTCAAAGA                                                     | F: 342→368        |
| 3aCOR-F2-362       | TCAAAGAAAAACCAAAGAAAACACCATCCG                                                  | F: 362→391        |
| 3aNS3-R2v2-5287    | TTACTTCCAGATCAGCTGACA                                                           | R: 5287←5307      |
| 3' half genome     |                                                                                 |                   |
| 3aNS3-F1-4642      | TTTGGCTACTGACGCCCTCAT                                                           | F: 4642→4663      |
| 3aNS3-F2-4651      | CTGACGCCCTCATGACTGGAT                                                           | F: 4651→4671      |
| 3aNS5B-R-9055      | GTACCCCAAGTTTCCTGAGG                                                            | R: 9055←9074      |
| Poly-U/UC Tract    |                                                                                 |                   |
| 3aF8769            | GTAATTACCTCACCCGTGATGC                                                          | F: 8742→8764      |
| 3aF8817            | AACTCCTGGTTGGGCAACATCATCA                                                       | F: 8790→8810      |
| XR9582             | ATGCGGCTCACGGACCTTTCACA                                                         | R: 9582←9604      |
| 3' UTR             |                                                                                 |                   |
| 3'RACE Adaptor     | /5Phos/rArArGrUrArGrUrUrUrCrGrUrCrGrUrUrUrGrCGTCACAAGTAAGT<br>AGCGGTAGTCG/3ddC/ | NA                |
| XF9550-22          | GTTGGCTCCATCTTAGCCCTAGT                                                         | Rev:9550→9571     |
| 3'RACE-R1          | GTCACAAGTAAGTAGCGGTAGTCG                                                        | NA                |
| 3'RACE-R2          | GTAGTTTCGGTCGTTTGCCTCACAAGTAAG                                                  | NA                |

### 3a Sequencing Primers

| Oligonucleotide | Sequence                         |
|-----------------|----------------------------------|
| 5'RACE-R2       | CGCGGATCCGAACACTGCGTTTGGCTTTGATG |
| 3aCOR-F1-342    | ATGAGCACACTTCCTAAACCTCAAAGA      |
| 3a5'-R2-803     | CCCGTCTCAAGGGCCCTCAC             |
| 3aR2-1a         | GAGGTGGCGAATCCGCA                |
| 3a5'-R1-841     | GAGCAACCGGGCAAGTTC               |
| 3aCOR-F2-362    | TCAAAGAAAAACCAAAGAAAACACCATCCG   |
| 3aF2-2          | GTAAAGTCATCGATACCC               |
| 3aF4            | TCCATGCAGGGCAACTGGG              |
| 3aF5            | CAATGGCTCGTGGCACATCA             |
| 3aF8            | CGTTGCCCTTTGGCTGATG              |
| 3aF9v2          | TGTGGGTCCCCCCTAC                 |
| 3aR11           | CAGTCCCGCAAGTGCATGGCTCAA         |
| 3aR11-2         | TGCGCCGAGCAGGAATGACAT            |
| 3aF10           | AATATTTAGTCCCATGGAAAT            |
| 3aF11           | GGCAGGGATAAGAACGT                |
| 3aF13           | CCGGCAGTGGTAAGAGCAC              |
| 3aF15           | GGGTACACCGGAGACTT                |
| 3aR18           | TGGACAAGTAAGCTCTCA               |
| 3aF17           | ACTGCTCCCAAGACGCGGTTCC           |
| 3aF19           | CACACCCATCACAAAATAC              |
| 3aF21           | ATAGGCCTGGGCAGGGTCTT             |
| 3aR25b          | CTTGAAACTCTGCAGCCACCGAGAG        |
| 3aF24           | GATGTTTCTGTGCTGACCTCGAT          |
| 3aF25           | ATGGGCAGCAACATTACACG             |
| 3aF27           | TGATAACACCATGTAGTGCTGAGG         |
| 3aR8997         | TGGAGTCTTCAATGATTGCTGGTA         |
| 3aF31           | GTAATTACCTCACCCGTGATGC           |
| 3aF8817         | AACTCCTGGTTGGGCAACATCATCA        |
| M13F-20         | CGTTGTAAAACGACGGCCAG             |
| M13R-20         | TCACACAGGAAACAGCTATGAC           |

## 4a Reverse Transcription Primers

| Oligonucleotide | Sequence                       | AF009606 position |
|-----------------|--------------------------------|-------------------|
| 5' UTR          | Random Decamers                |                   |
| 5' half genome  |                                |                   |
| 4aNS3-R2v2-5299 | ACGTGCTCGTCACTACCTCGA          | R: 5299←-5319     |
| 3' half genome  |                                |                   |
| 4aNS5B-R-9337   | AGTAGGAGTAGGCACAGGAGTAAATA     | R: 9312←-9337     |
| Poly-U/UC Tract |                                |                   |
| XR9582          | ATGCGGCTCACGGACCTTTCACA        | R: 9582←-9604     |
| 3' UTR          |                                |                   |
| 3'RACE-R2       | GTAGTTTCGGTCGTTTGCCTCACAAGTAAG | NA                |

## 4a Amplification Primers

| Oligonucleotide    | Sequence                                                                        | AF009606 position |
|--------------------|---------------------------------------------------------------------------------|-------------------|
| 5' UTR             |                                                                                 |                   |
| Ambion FirstChoice |                                                                                 | NA                |
| 5' adaptor         | GGCGATGAATGAACACTGCGTTTGTGGCTTTGATGAAA                                          |                   |
| 5'RACE-F1          | GCTGATGGCGATGAATGAACACTG                                                        | NA                |
| 5'RACE-F2          | CGCGGATCCGAACACTGCGTTTGTGGCTTTGATG                                              | NA                |
| 4aR4-2-732         | GATGTATCCCATGAGGTCGGC                                                           | R: 732←-752       |
| 4aR4-670           | CCTCCGCCGGGGATCAT                                                               | R: 670←-686       |
| 5' half genome     |                                                                                 |                   |
| 4aCOR-F1-342       | ATGAGCACACTTCCTAAACCTCAAAGA                                                     | F: 342→-368       |
| 4aCOR-F2-362       | TCAAAGAAAAACCAAACGTAACACCAACCG                                                  | F: 362→-391       |
| 4aNS3-R2v2-5299    | ACGTGCTCGTCACTACCTCGA                                                           | R: 5299←-5319     |
| 3' half genome     |                                                                                 |                   |
| 4aNS3-F1-4642      | TCTGCGCCACGGACGCCCTCAT                                                          | F: 4642→-4663     |
| 4aNS3-F2-F4681     | ACTTTGACTCAGTGATAGACTGCAA                                                       | F: 4681→-4707     |
| 4aNS5B-R-9337      | AGTAGGAGTAGGCACAGGAGTAAATA                                                      | R: 9312←-9337     |
| Poly-U/UC Tract    |                                                                                 |                   |
| 4aF8790            | TGGGAGACAGTCCGACACACT                                                           | F: 8790→-8810     |
| 4aF9090            | TTGAGAGCGTGGAGACATCG                                                            | F: 9090→-9109     |
| XR9582             | ATGCGGCTCACGGACCTTTCACA                                                         | R: 9582←-9604     |
| 3' UTR             |                                                                                 |                   |
| 3'RACE Adaptor     | /5Phos/rArArArGrUrArGrUrUrUrCrGrUrCrGrUrUrGrCGTCACAAGTAAGT<br>AGCGGTAGTCG/3ddC/ | NA                |
| XF9550-22          | GTGGCTCCATCTTAGCCCTAGT                                                          | R: 9550→-9571     |
| 3'RACE-R1          | GTCACAAGTAAGTAGCGGTAGTCG                                                        | NA                |
| 3'RACE-R2          | GTAGTTTCGGTCGTTTGCCTCACAAGTAAG                                                  | NA                |

## 4a Sequencing Primers

| Oligonucleotide | Sequence                           |
|-----------------|------------------------------------|
| 4aR4            | CCTCCGCCGGGGATCAT                  |
| 5'RACE-R2       | CGCGGATCCGAACACTGCGTTTGTGGCTTTGATG |
| 4aCOR-F1-342    | ATGAGCACACTTCCTAAACCTCAAAGA        |
| 4aF1a           | ACTTCGGAGCGGTCGCAAC                |
| 4aR4b           | CCCAATTAGCTTGCATG                  |
| 4aR6            | TTGGAGTAGGTAGTCTCCGGATG            |
| 4aF4            | CATGCAAGCTAATTGGG                  |
| 4aR9            | CGAAGGATGGAACATAGAC                |
| 4aR10b          | TTTCTCCATGGCCGTGAACAC              |
| 4aF9            | GTCTATGTTCCATCCTTCG                |
| 4aF10b          | GTGTTACACGGCCATGGAGAAA             |
| 4aR16b          | AGTCAACGGTCTGTATTAC                |
| 4aF14           | GTAATACAGACCGTTGACT                |
| 4aF16b          | TAGGCTTGAGGCGGATTAGGCACTTCCA       |
| 4aR18           | GCTGACACCGGCTGAGACAA               |
| 4aF17           | ACTACCAGTGCTCCAGGCGATA             |
| 4aR21           | TCGACGAAATGGAGGAGTG                |
| 4aF19           | GACGCCTCCACAAGTGGATCAA             |
| 4aF22           | TGGCATGGGACCTTCCCCATCAA            |
| 4aF23           | GTCCATGAATATGACATTGAGC             |
| 4aR27           | GAGTCCGTCGTTTCTACCGCTTT            |
| 4aF26           | GATAGCACGTCAGTGTGTT                |
| 4aR30           | CTGCCAGATCAAAAATTTGGCTA            |
| 4aF28           | TGGGAGACAGTCCGACACACT              |
| 4aF31           | CGATGTCTCCACGCTCTCAA               |
| 4aR32           | CGTTGTAAAACGACGGCCAG               |
| M13F-20         | TCACACAGGAAACAGCTATGAC             |
| M13R-20         |                                    |
