# Supplementary figures and images for: Identification, Molecular Cloning, and Analysis of Full-Length Hepatitis C Virus Transmitted/Founder Genotypes 1, 3, and 4
Source: PubMed Central journal article supplement — mBio. 2015 Feb 24;6(2):e02518-14. doi: 10.1128/mBio.02518-14 (PMC4358020; doi:10.1128/mbio.02518-14), 2015-02-24

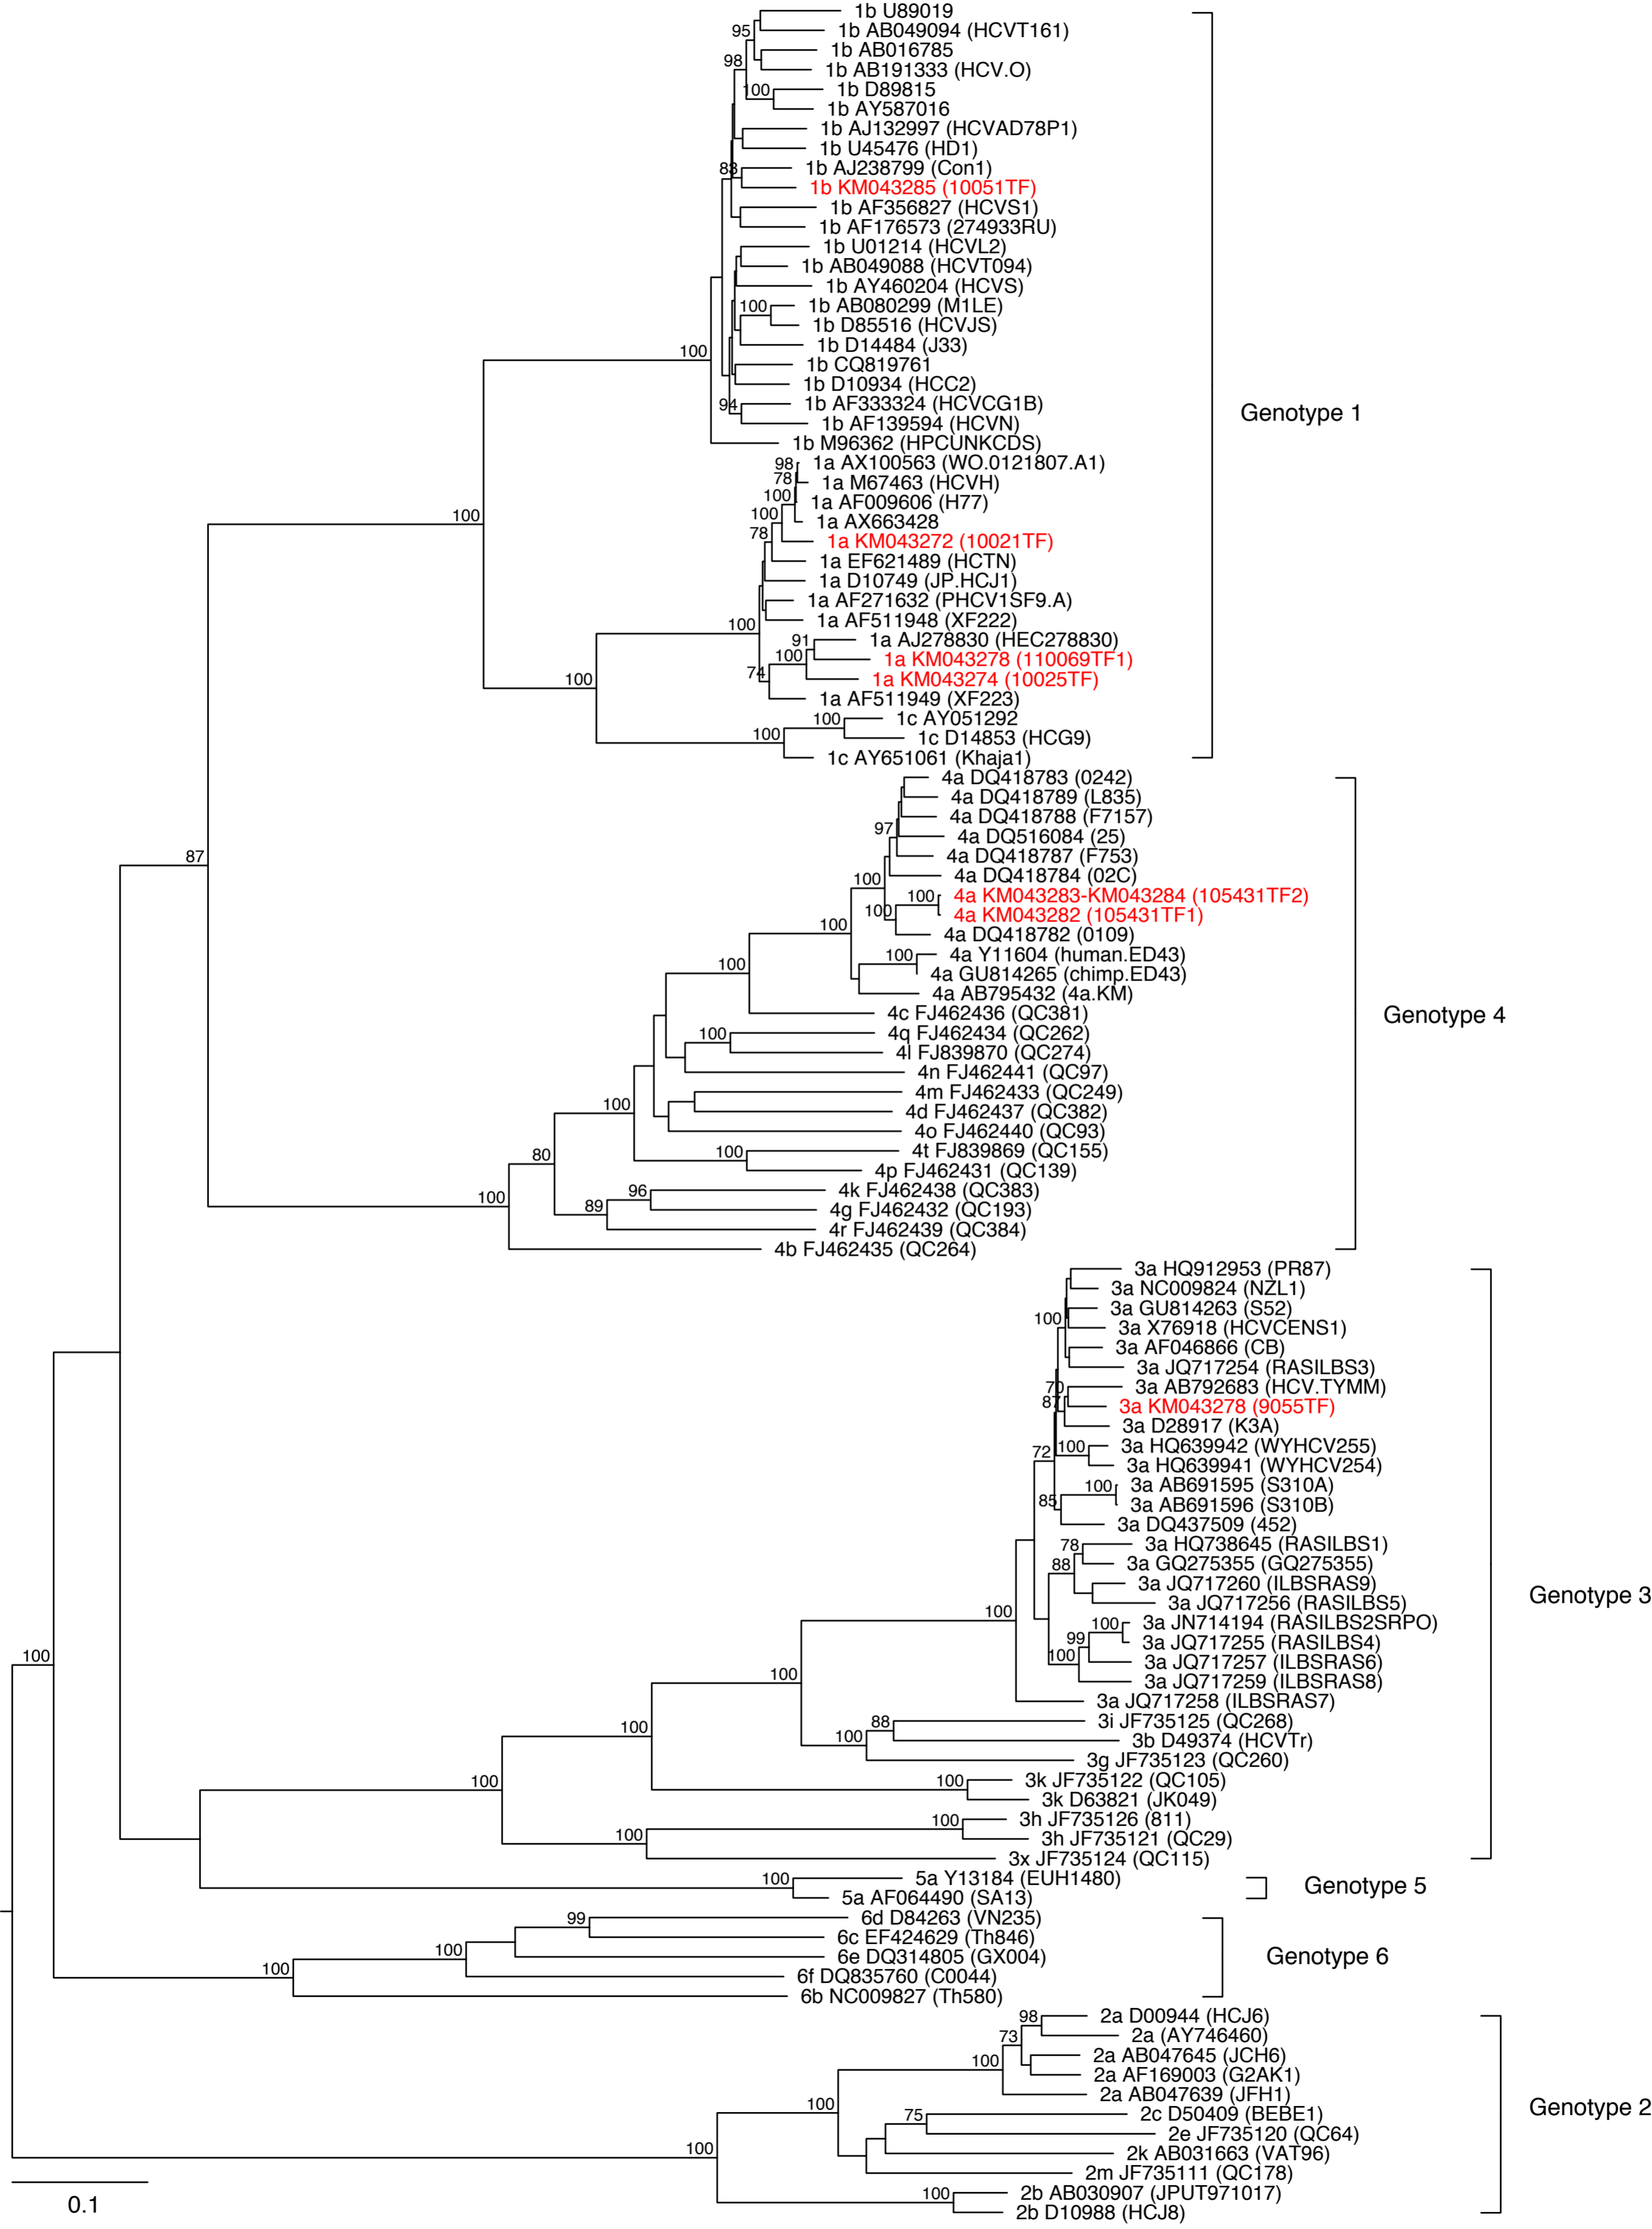

Supplement: mbo001152189sf1.pdf [file mbo001152189sf1.pdf]

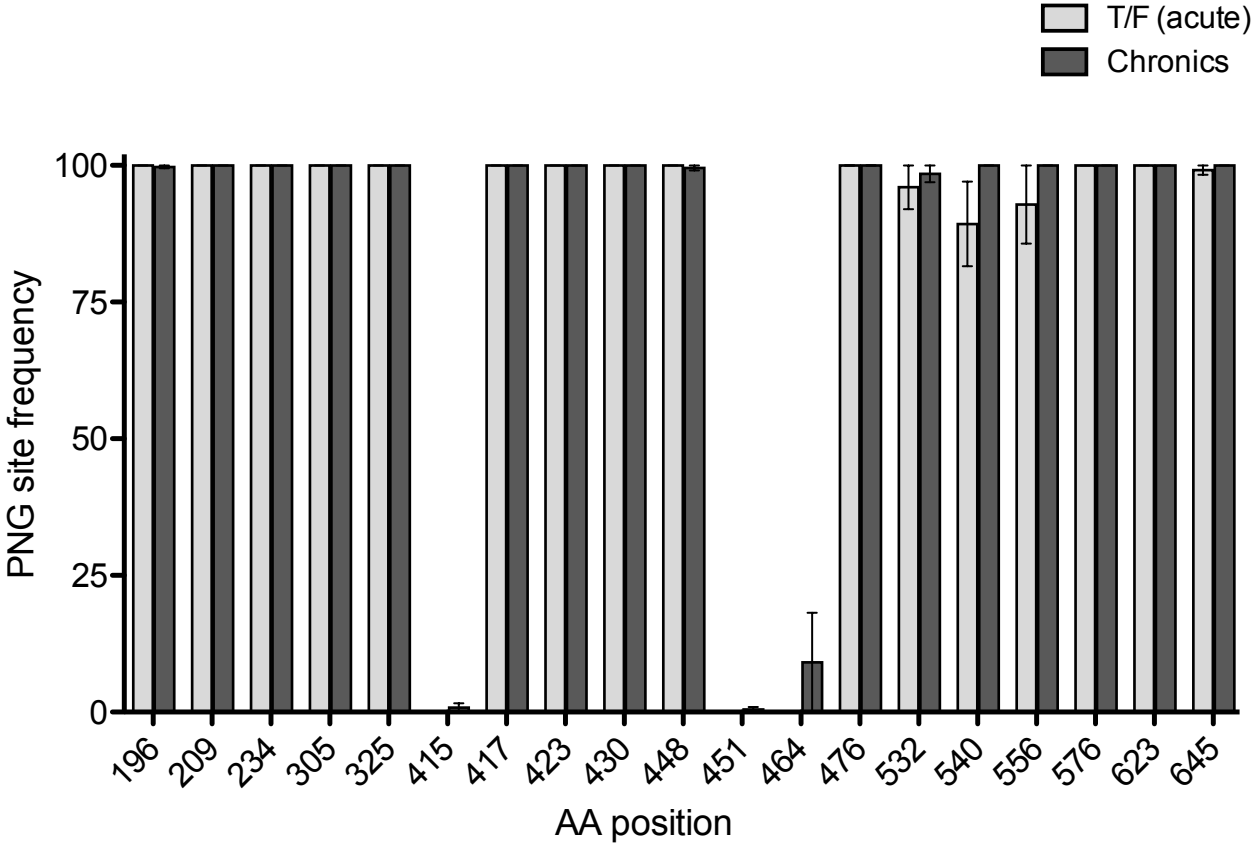

Supplement: mbo001152189sf2.pdf [file mbo001152189sf2.pdf]

A

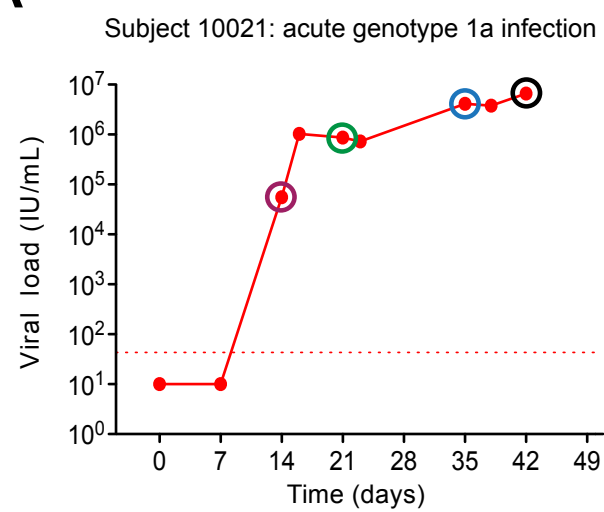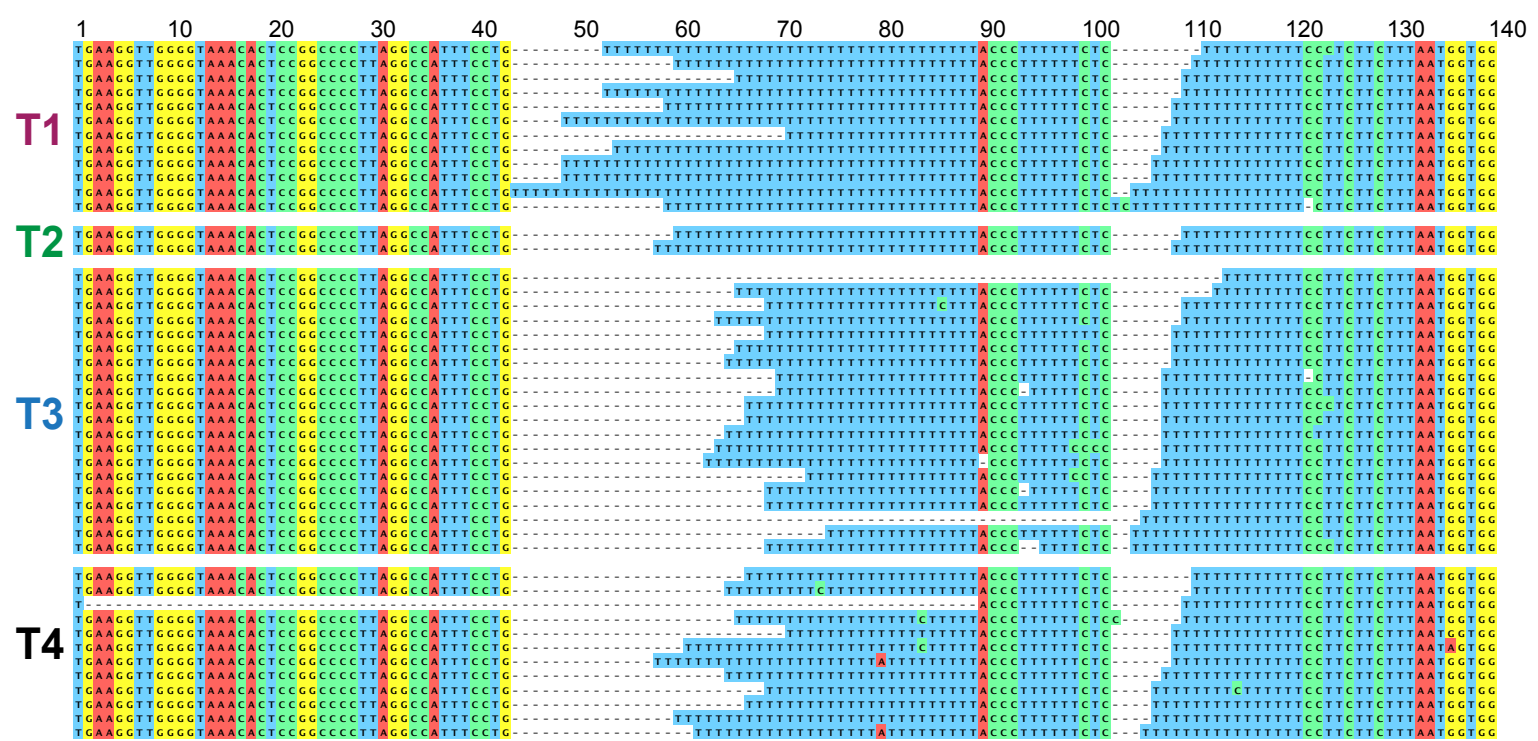

B

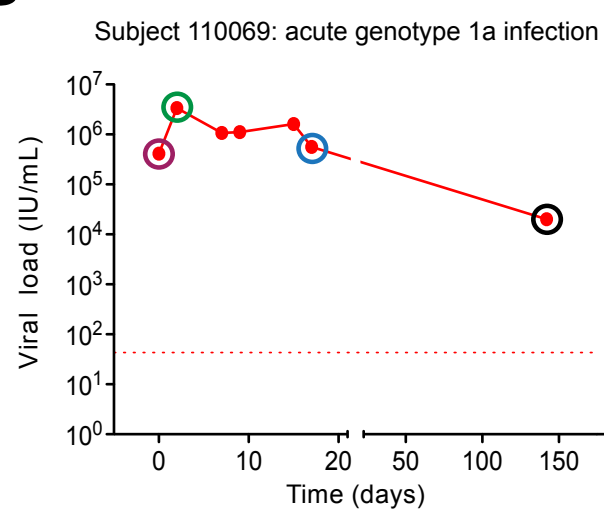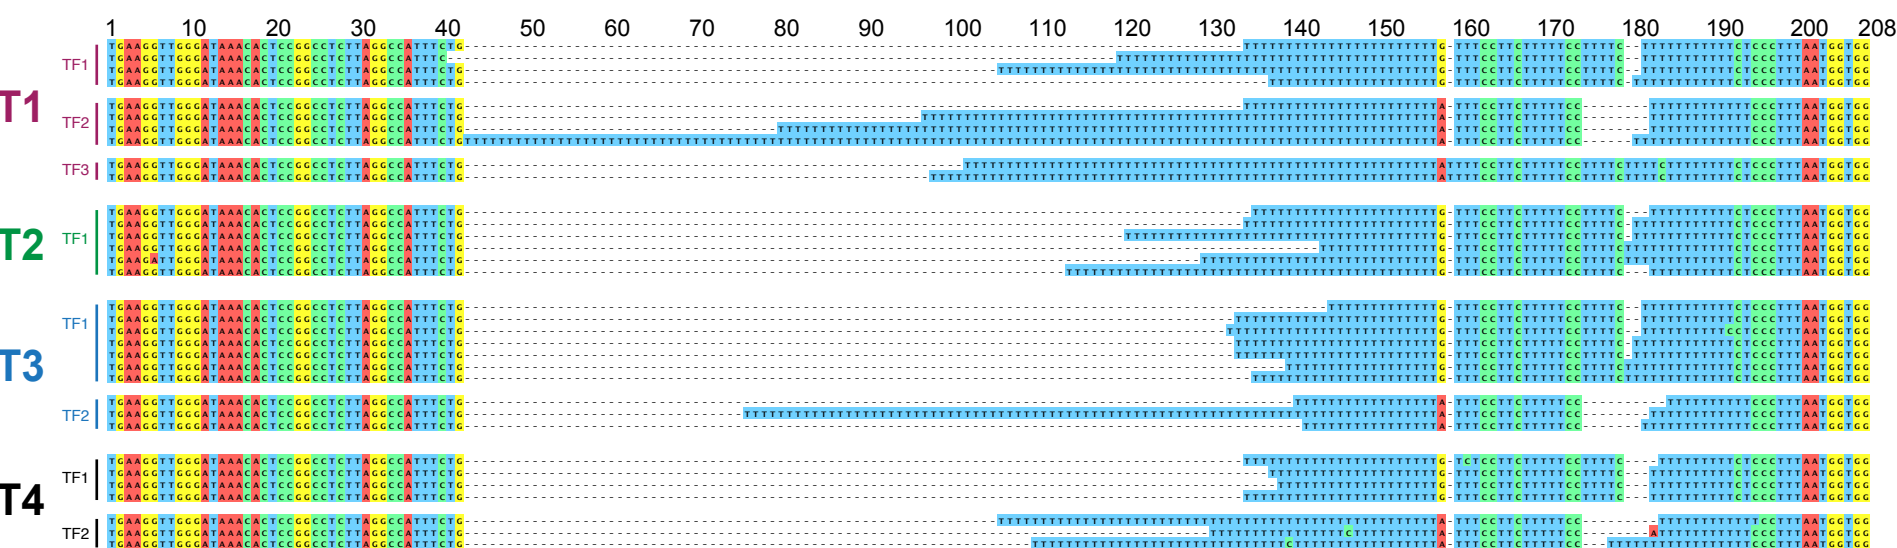

C

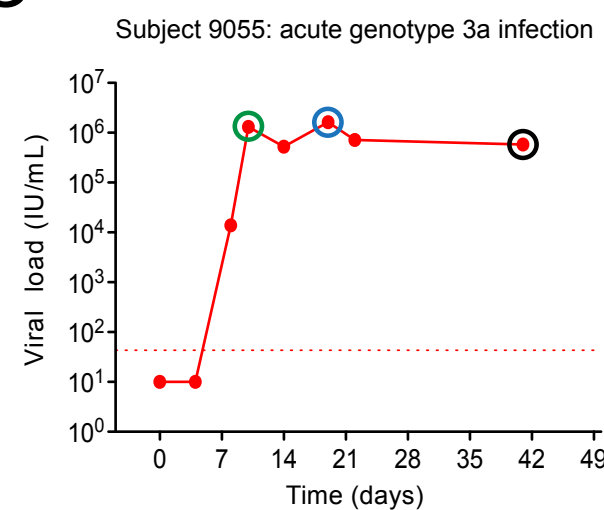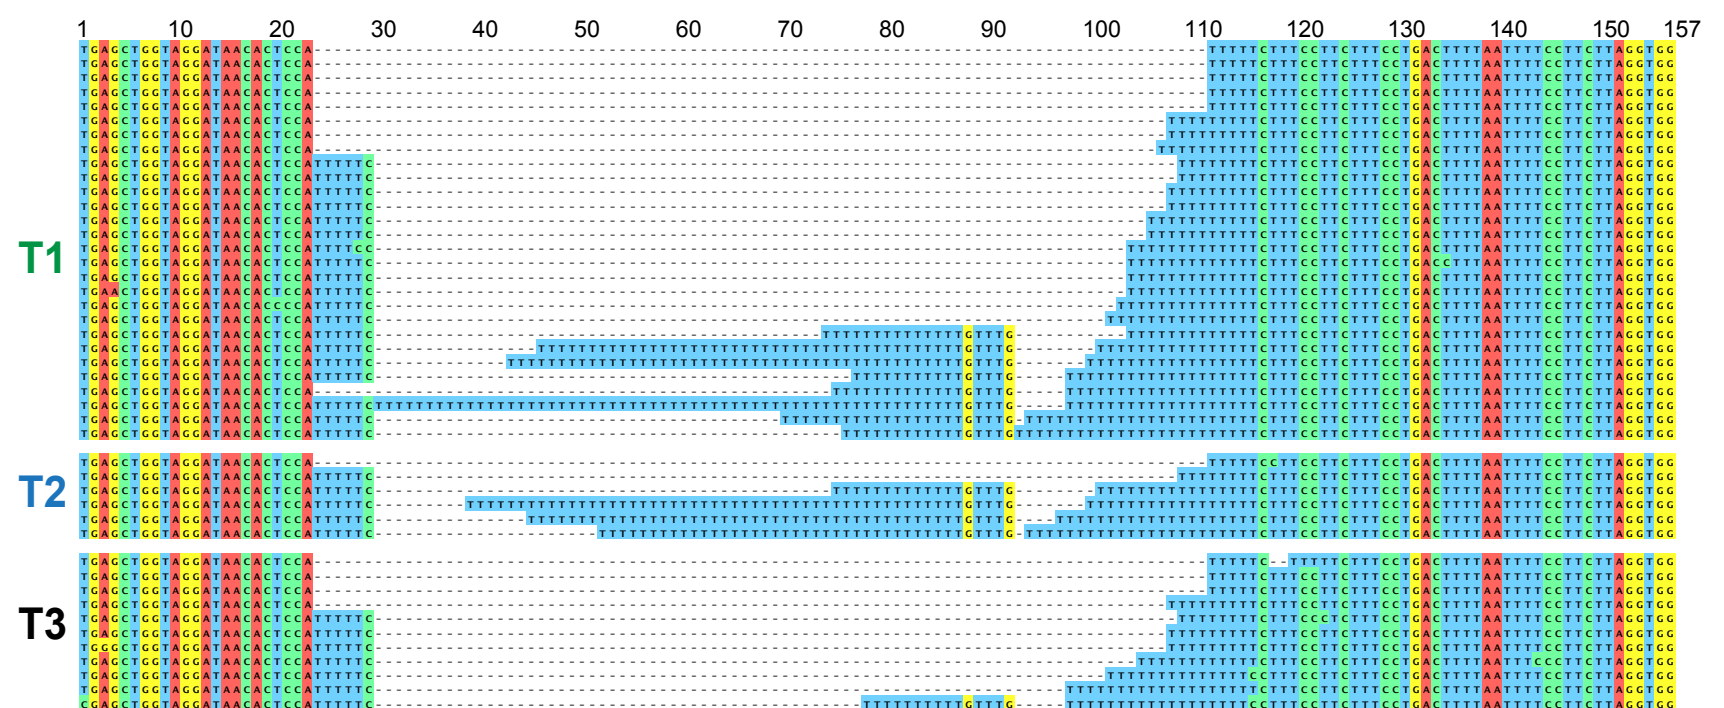

D

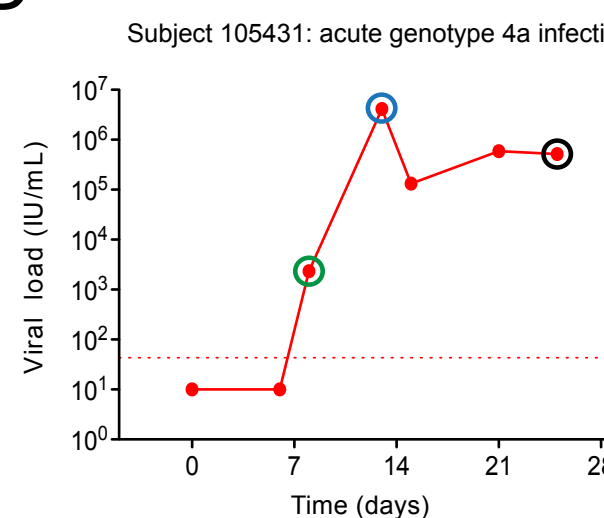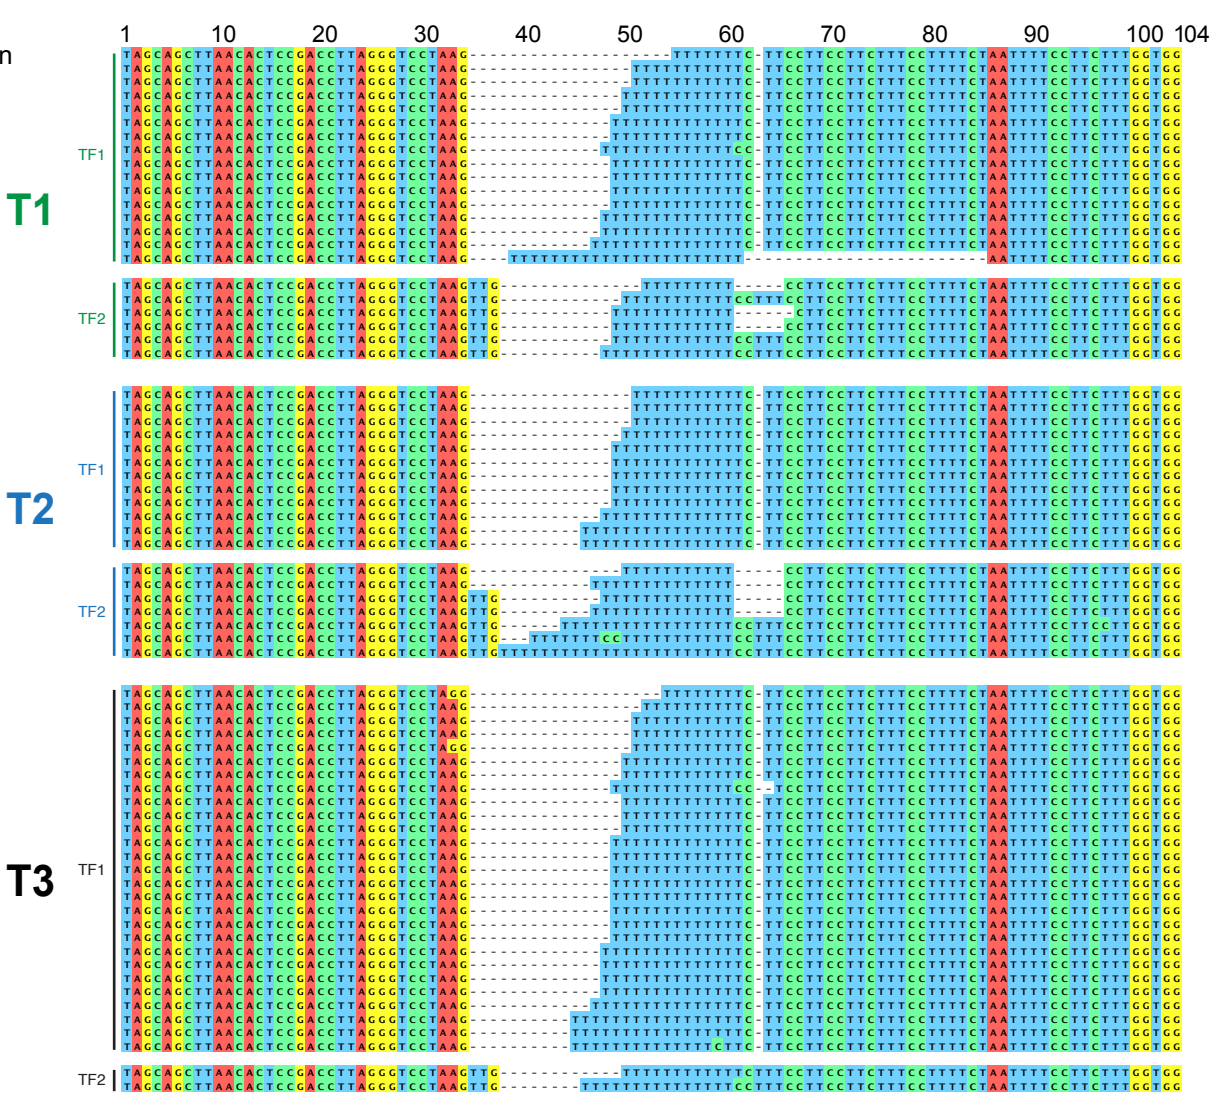

Supplement: mbo001152189sf3.pdf [file mbo001152189sf3.pdf]

A

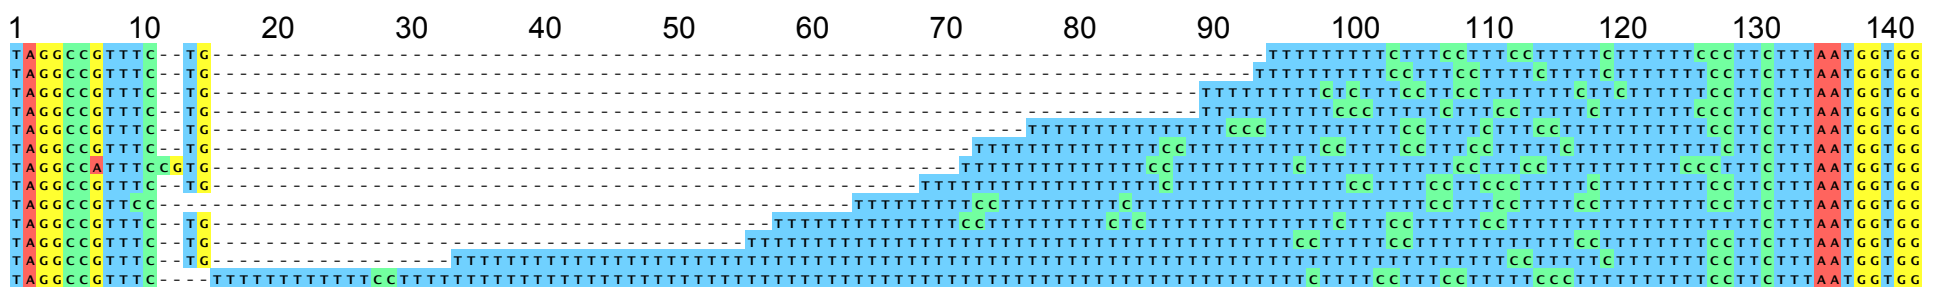

B

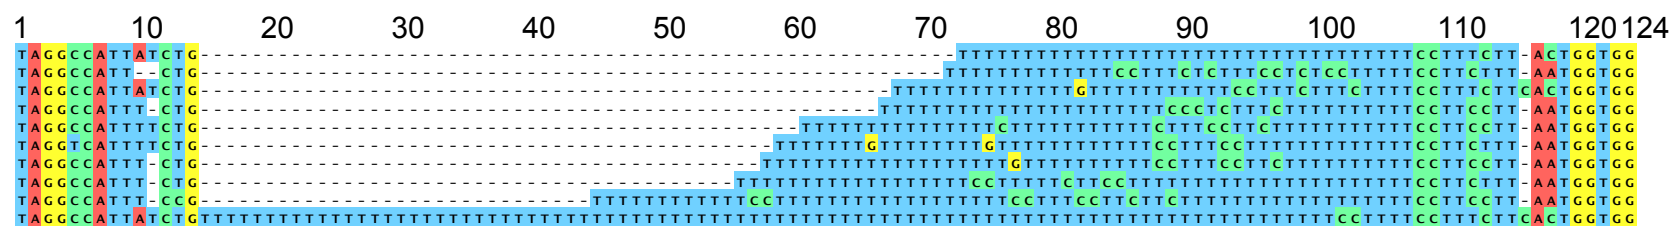

C

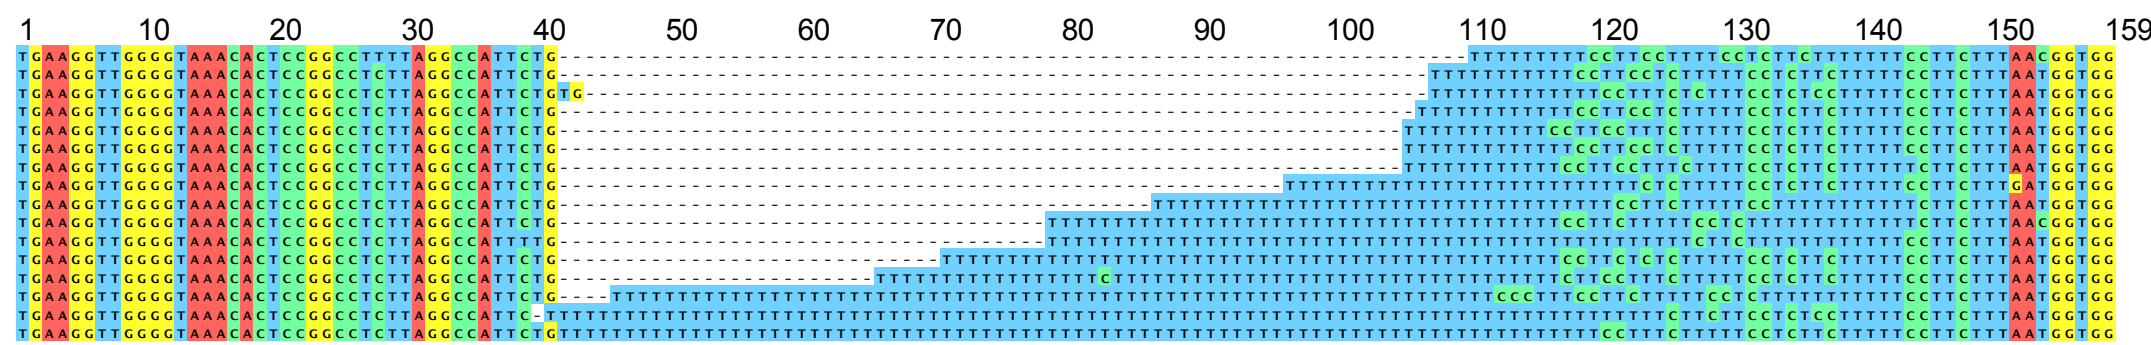

D

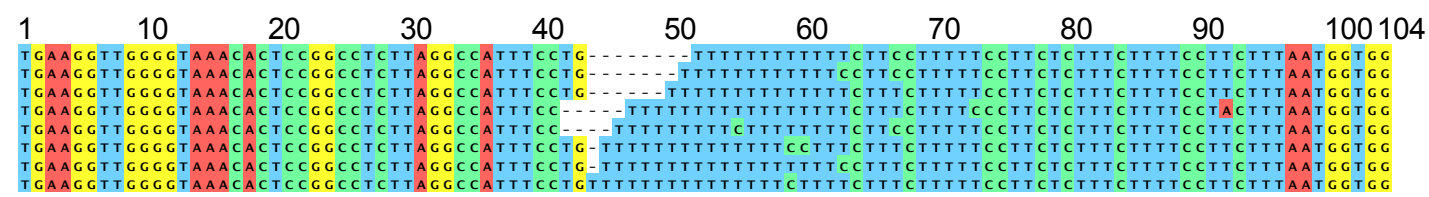

E

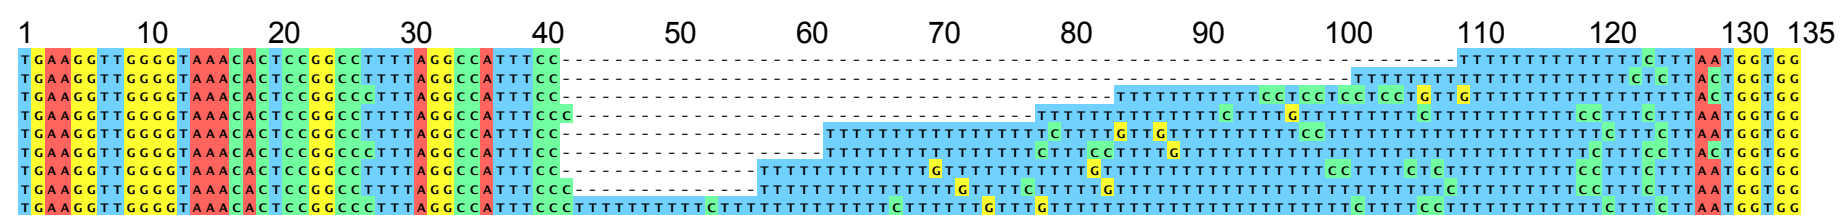

F

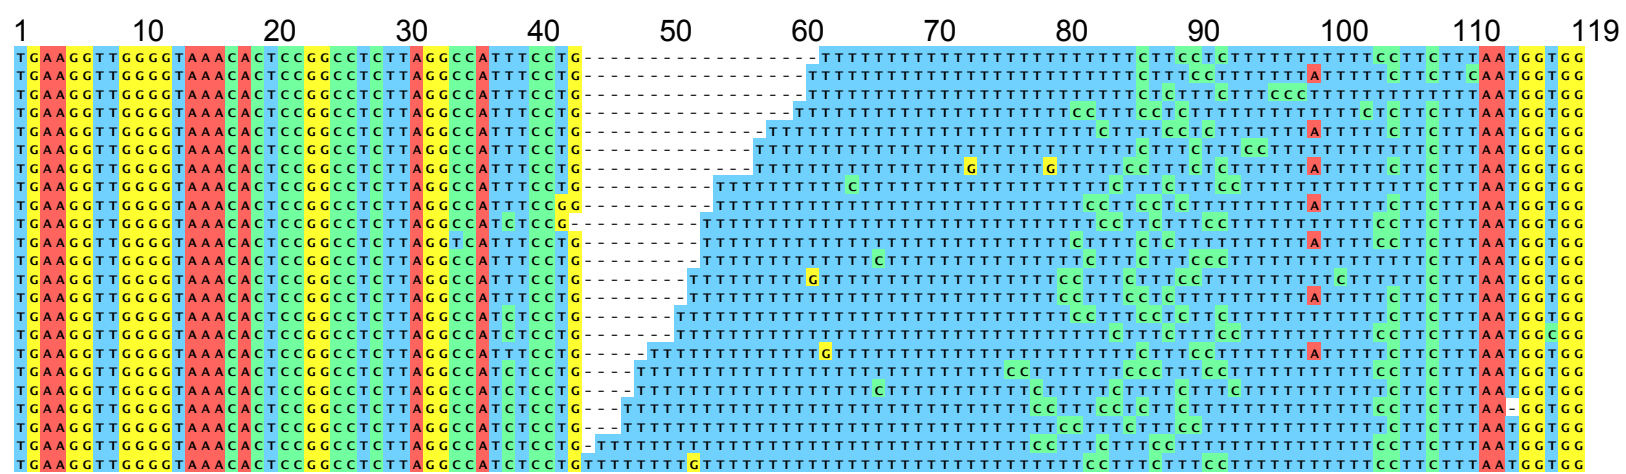

G

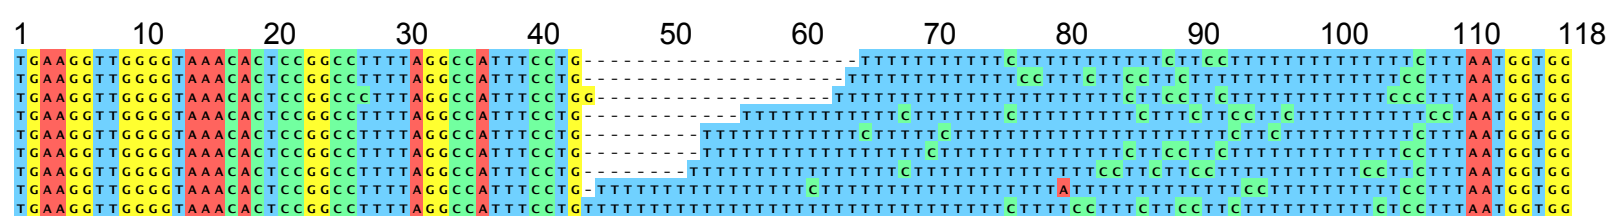

Supplement: mbo001152189sf4.pdf [file mbo001152189sf4.pdf]

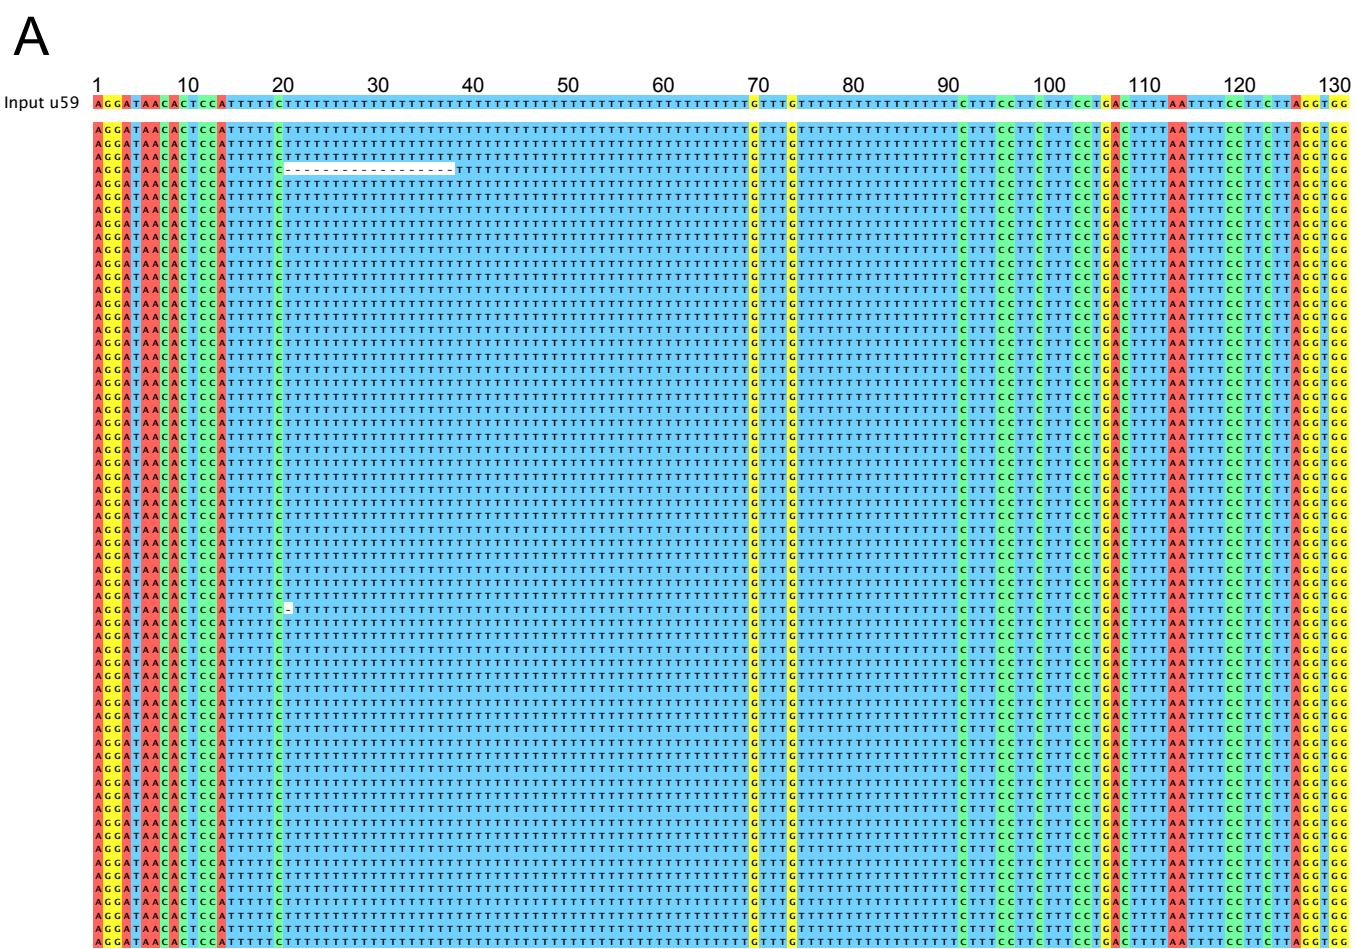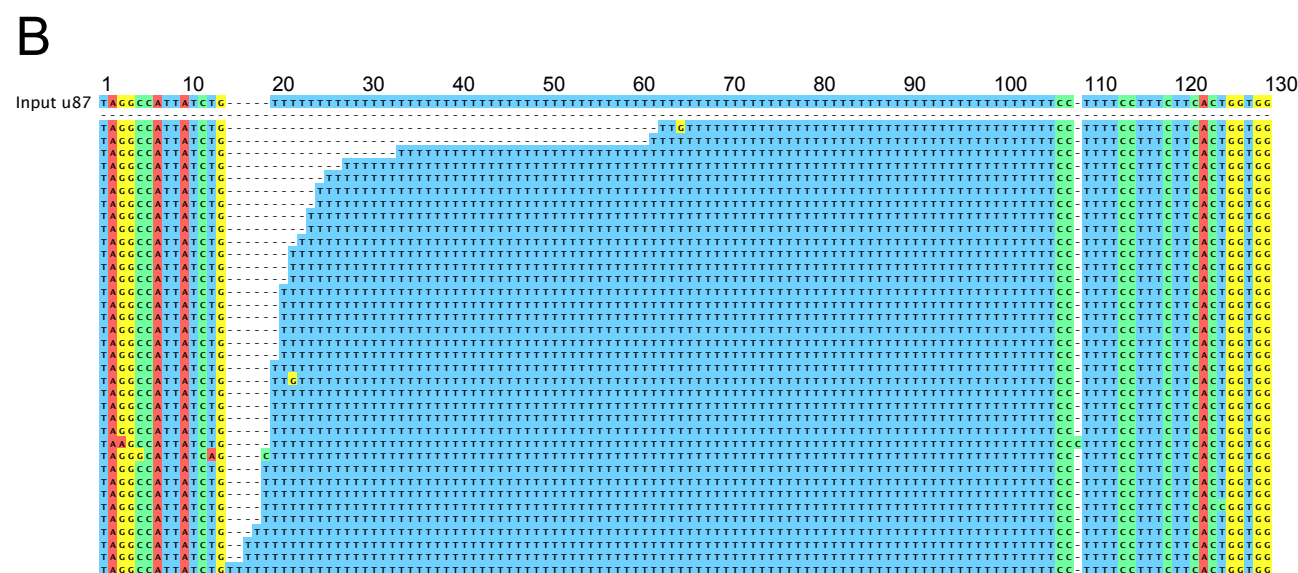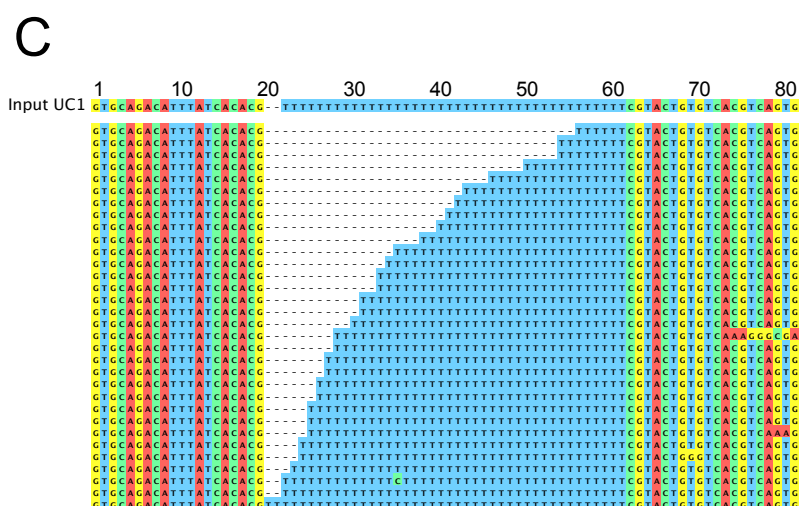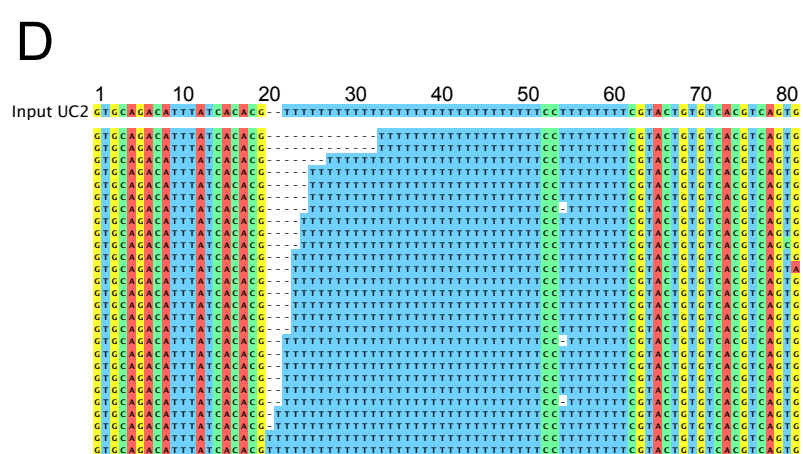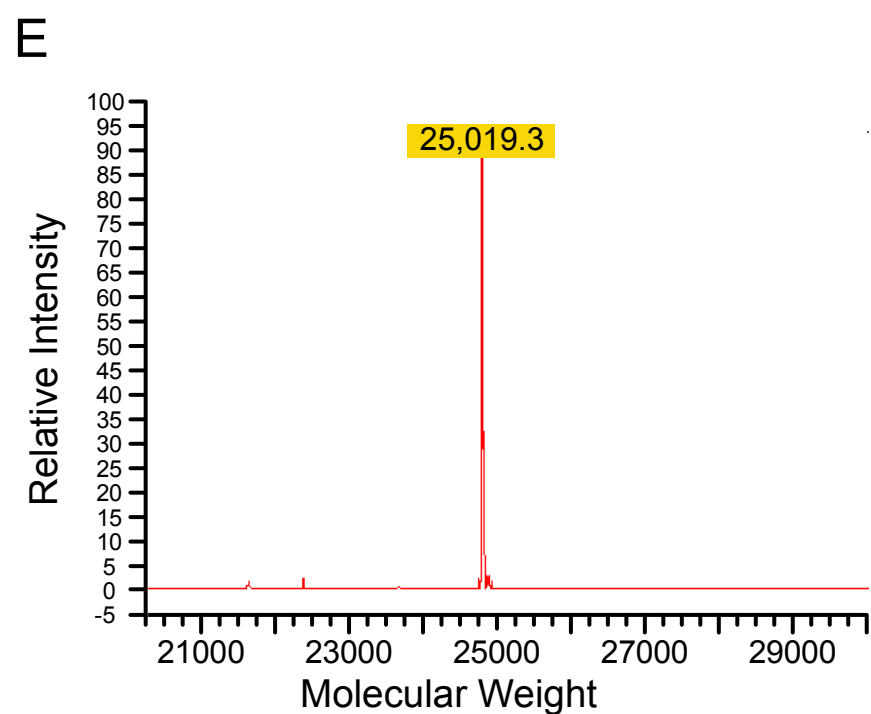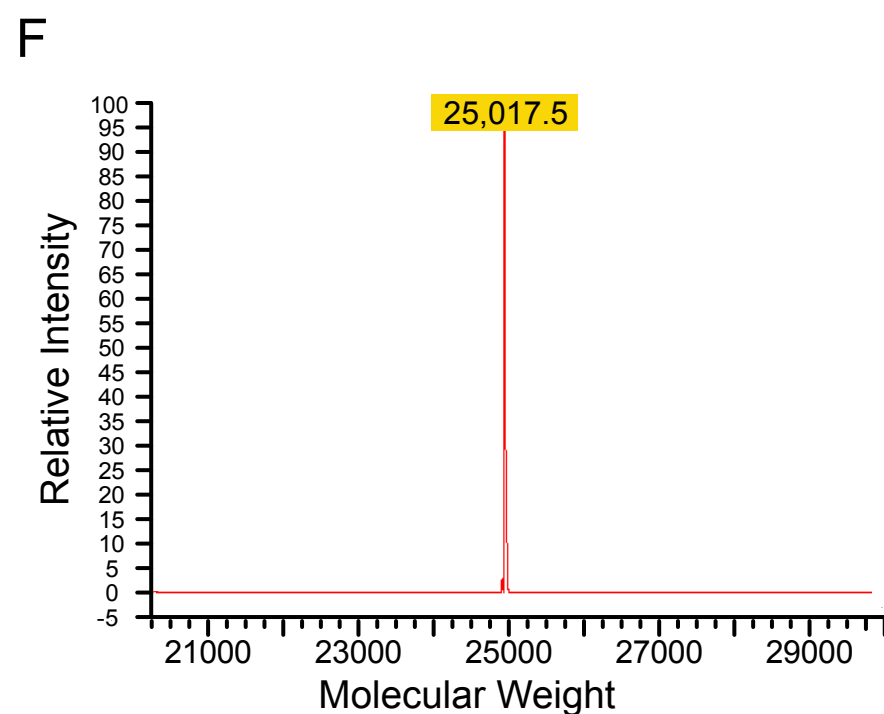

Supplement: mbo001152189sf5.pdf [file mbo001152189sf5.pdf]

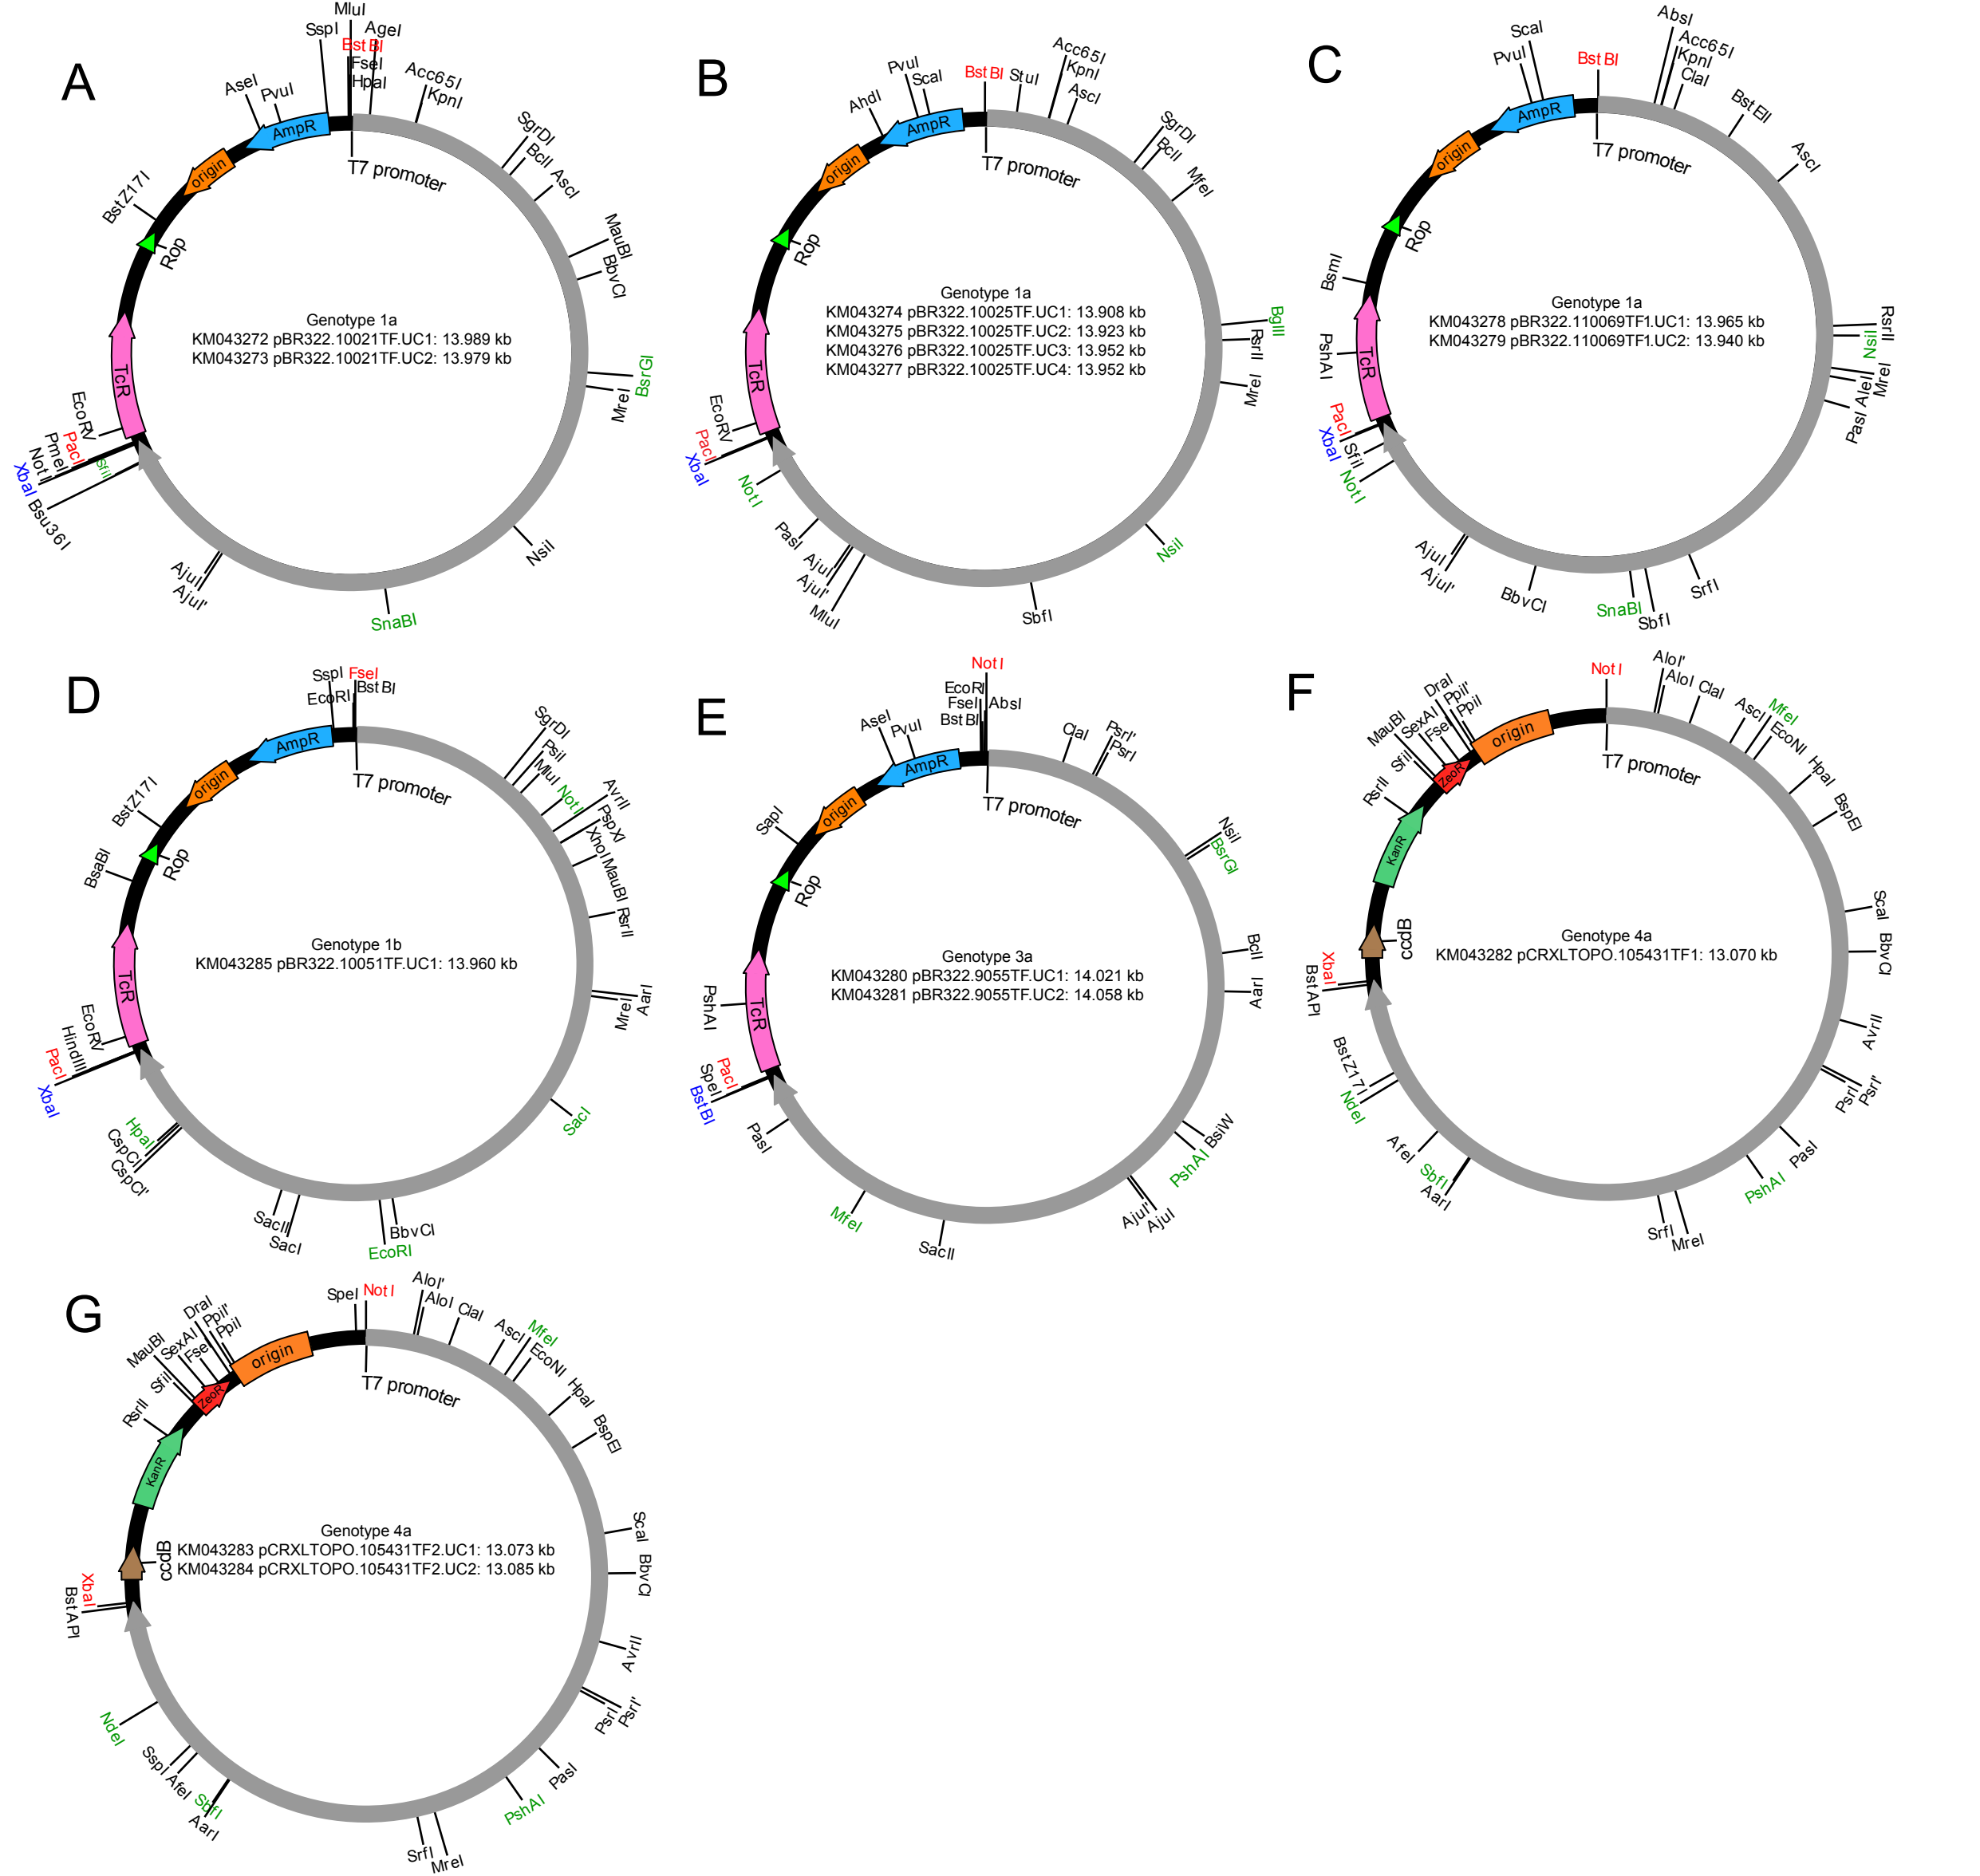

**F**

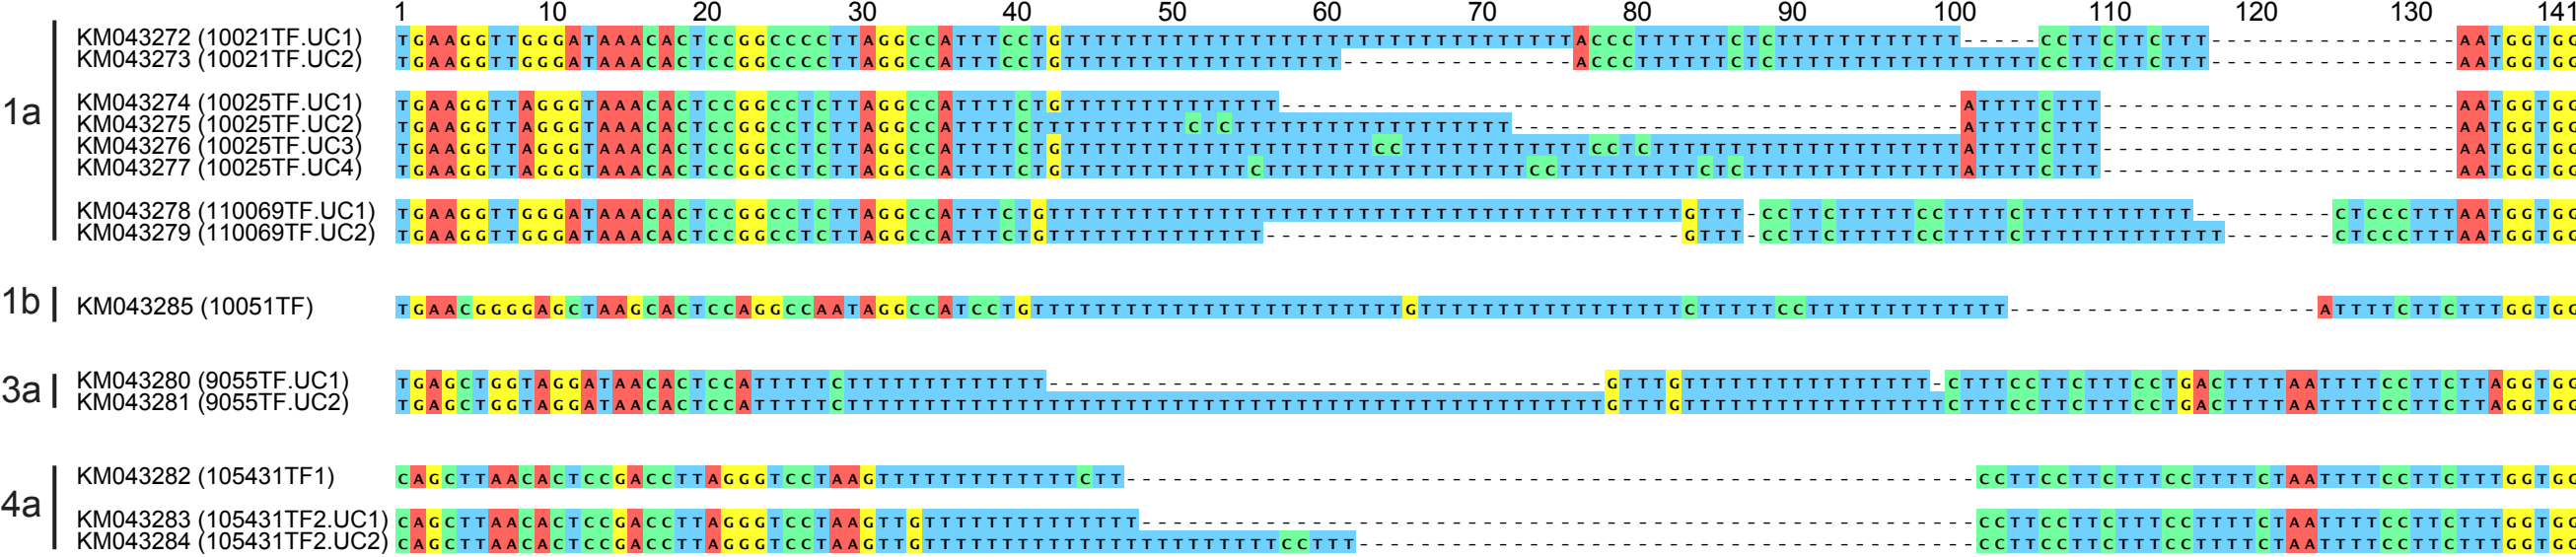

Supplement: mbo001152189sf6.pdf [file mbo001152189sf6.pdf]
